# Supplementary material
Source: PubMed Central journal article supplement (PMC4783243)
Supplement: NIHMS752610-supplement-supplement_1.pdf [file NIHMS752610-supplement-supplement_1.pdf]

## SUPPLEMENTARY METHODS

### *Open field test*

Locomotor activity in mice was tested in a novel open field as described previously (Beurel et al., 2013). Mice were placed in a Plexiglas open field arena (Med Associates, St Albans, VT) outfitted with photobeam detectors under soft overhead lighting, and activity was monitored using activity monitoring software (Med Associates). Distance travelled during each 5 min block was calculated.

## SUPPLEMENTARY FIGURE LEGENDS

**Supplementary Figure 1. Cytokines and chemokines in the hippocampus after one or two stresses.**

Mice were subjected to one or two daily sessions of inescapable foot shocks separated by 24 hr. Hippocampi were collected 1, 6, 12, and 24 hr after a single session of inescapable shocks, or 0.25, 1, 3, and 6 hr after two daily sessions of inescapable foot shocks, followed by measurements of cytokines and chemokines by multiplex analysis. Hippocampi from 3-4 mice were pooled in each group for multiplex analysis.

**Supplementary Figure 2. Cytokines and chemokines in the prefrontal cortex after one or two stresses.**

Mice were subjected to one or two daily sessions of inescapable foot shocks separated by 24 hr. Prefrontal cortex was collected 1, 6, 12, and 24 hr after a single session of inescapable shocks, or 0.25, 1, 3, and 6 hr after two daily sessions of inescapable foot shocks, followed by measurements of cytokines and chemokines by multiplex analysis. The prefrontal cortex from 3-4 mice were pooled in each group for multiplex analysis.

**Supplementary Figure 3. Effects of TLR4 deficiency on stress-induced increases in hippocampal cytokines and chemokines.**

Wild-type and TLR4<sup>-/-</sup> mice were subjected to one or two daily sessions of inescapable foot shocks followed by measurements of cytokines and chemokines in the hippocampus by multiplex analysis. Hippocampi were collected 6, 12, and 24 hr after a single stress, or 1 and 3 hr after two stresses. Hippocampi from 3-4 mice in each group were pooled for multiplex analysis. (A) Hippocampal cytokines and chemokines that are diminished in TLR4<sup>-/-</sup> mice after one or two daily sessions of inescapable foot shocks compared to WT mice. (B) Hippocampal cytokines and chemokines that have similar or

larger increases in TLR4<sup>-/-</sup> mice compared to wild-type mice after a single or two daily sessions of inescapable foot shocks.

**Supplementary Figure 4. Pretreatment with fluoxetine or TDZD-8 attenuate stress-induced cytokines and chemokines in mouse hippocampus.**

Following two weeks of daily treatment with fluoxetine (Flx), TDZD-8 or saline (Sal), mice were subjected to two daily sessions of inescapable foot shocks and after 3 hr cytokines and chemokines in the hippocampus were measured by multiplex. Hippocampi from 3-4 mice were pooled in each group for multiplex analysis.

**Supplementary Figure 5. Intranasal administration of HMGB1 siRNA blocked the accelerated rate of cytokine and chemokine increases in mouse hippocampus induced by a prior stress.**

HMGB1 siRNA or scrambled siRNA was administered intranasally to mice 1 hr after the first of two daily sessions of inescapable foot shocks. Hippocampi were collected 3 and 12 hr after two daily sessions of inescapable foot shocks, followed by measurements of cytokines and chemokines by multiplex analysis. Hippocampi from 4 mice were pooled for multiplex analysis.

**Supplementary Figure 6. Effects of stress on prefrontal cortex HMGB1 levels in the prefrontal cortex.**

Prefrontal cortex HMGB1 levels 24 hr after a single session of inescapable foot shocks. n = 3-4 in each group.

**Supplementary Figure 7. Behavior of TLR4<sup>-/-</sup> mice.**

TLR4 deficiency did not alter (A) locomotor activity in a novel open field (n = 4-5 mice per group) and (B) the sensitivity to foot shocks measured by latency to escape from escapable foot shocks (n = 8-14 mice per group).

**Supplementary Table 1. Times of peak levels after one or two stresses for hippocampal cytokines and chemokines.**

**Supplementary Table 2. Reported effects of stress on rodent brain cytokine levels.**

**Supplementary Table 3. Reported effects of stress on cytokine increases induced by LPS.**

Supplementary Figure 1

**A**

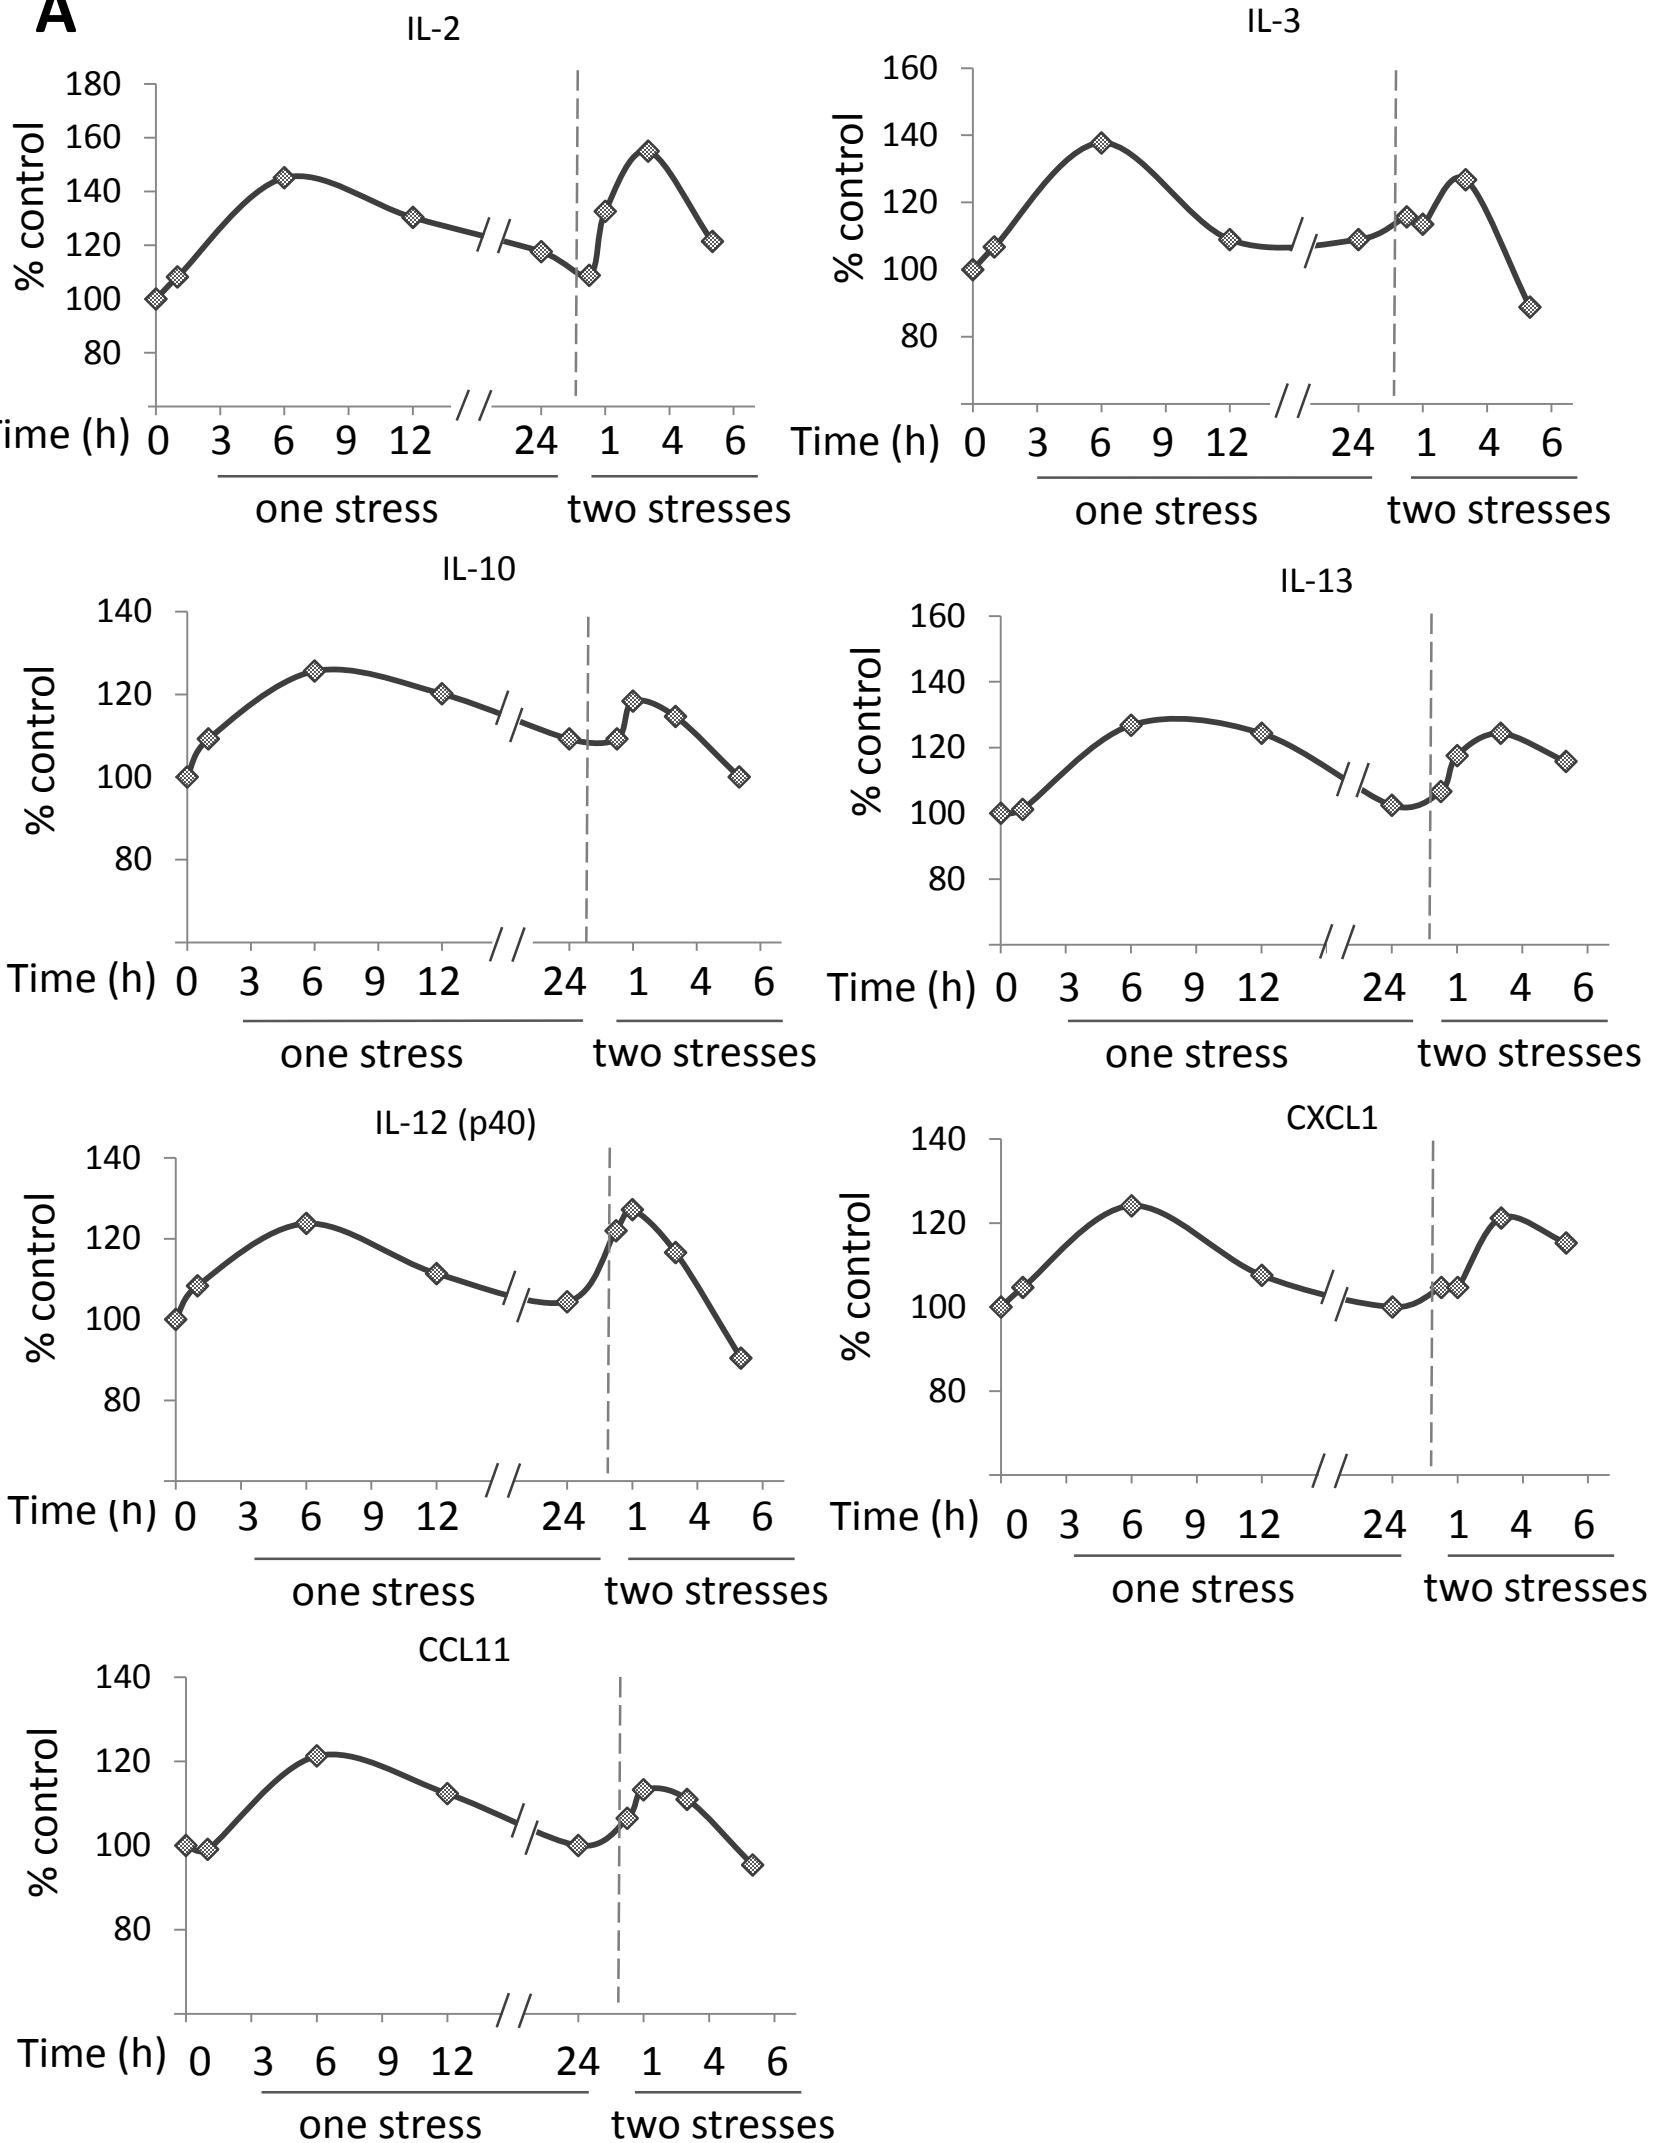

Supplementary Figure 1

**B**

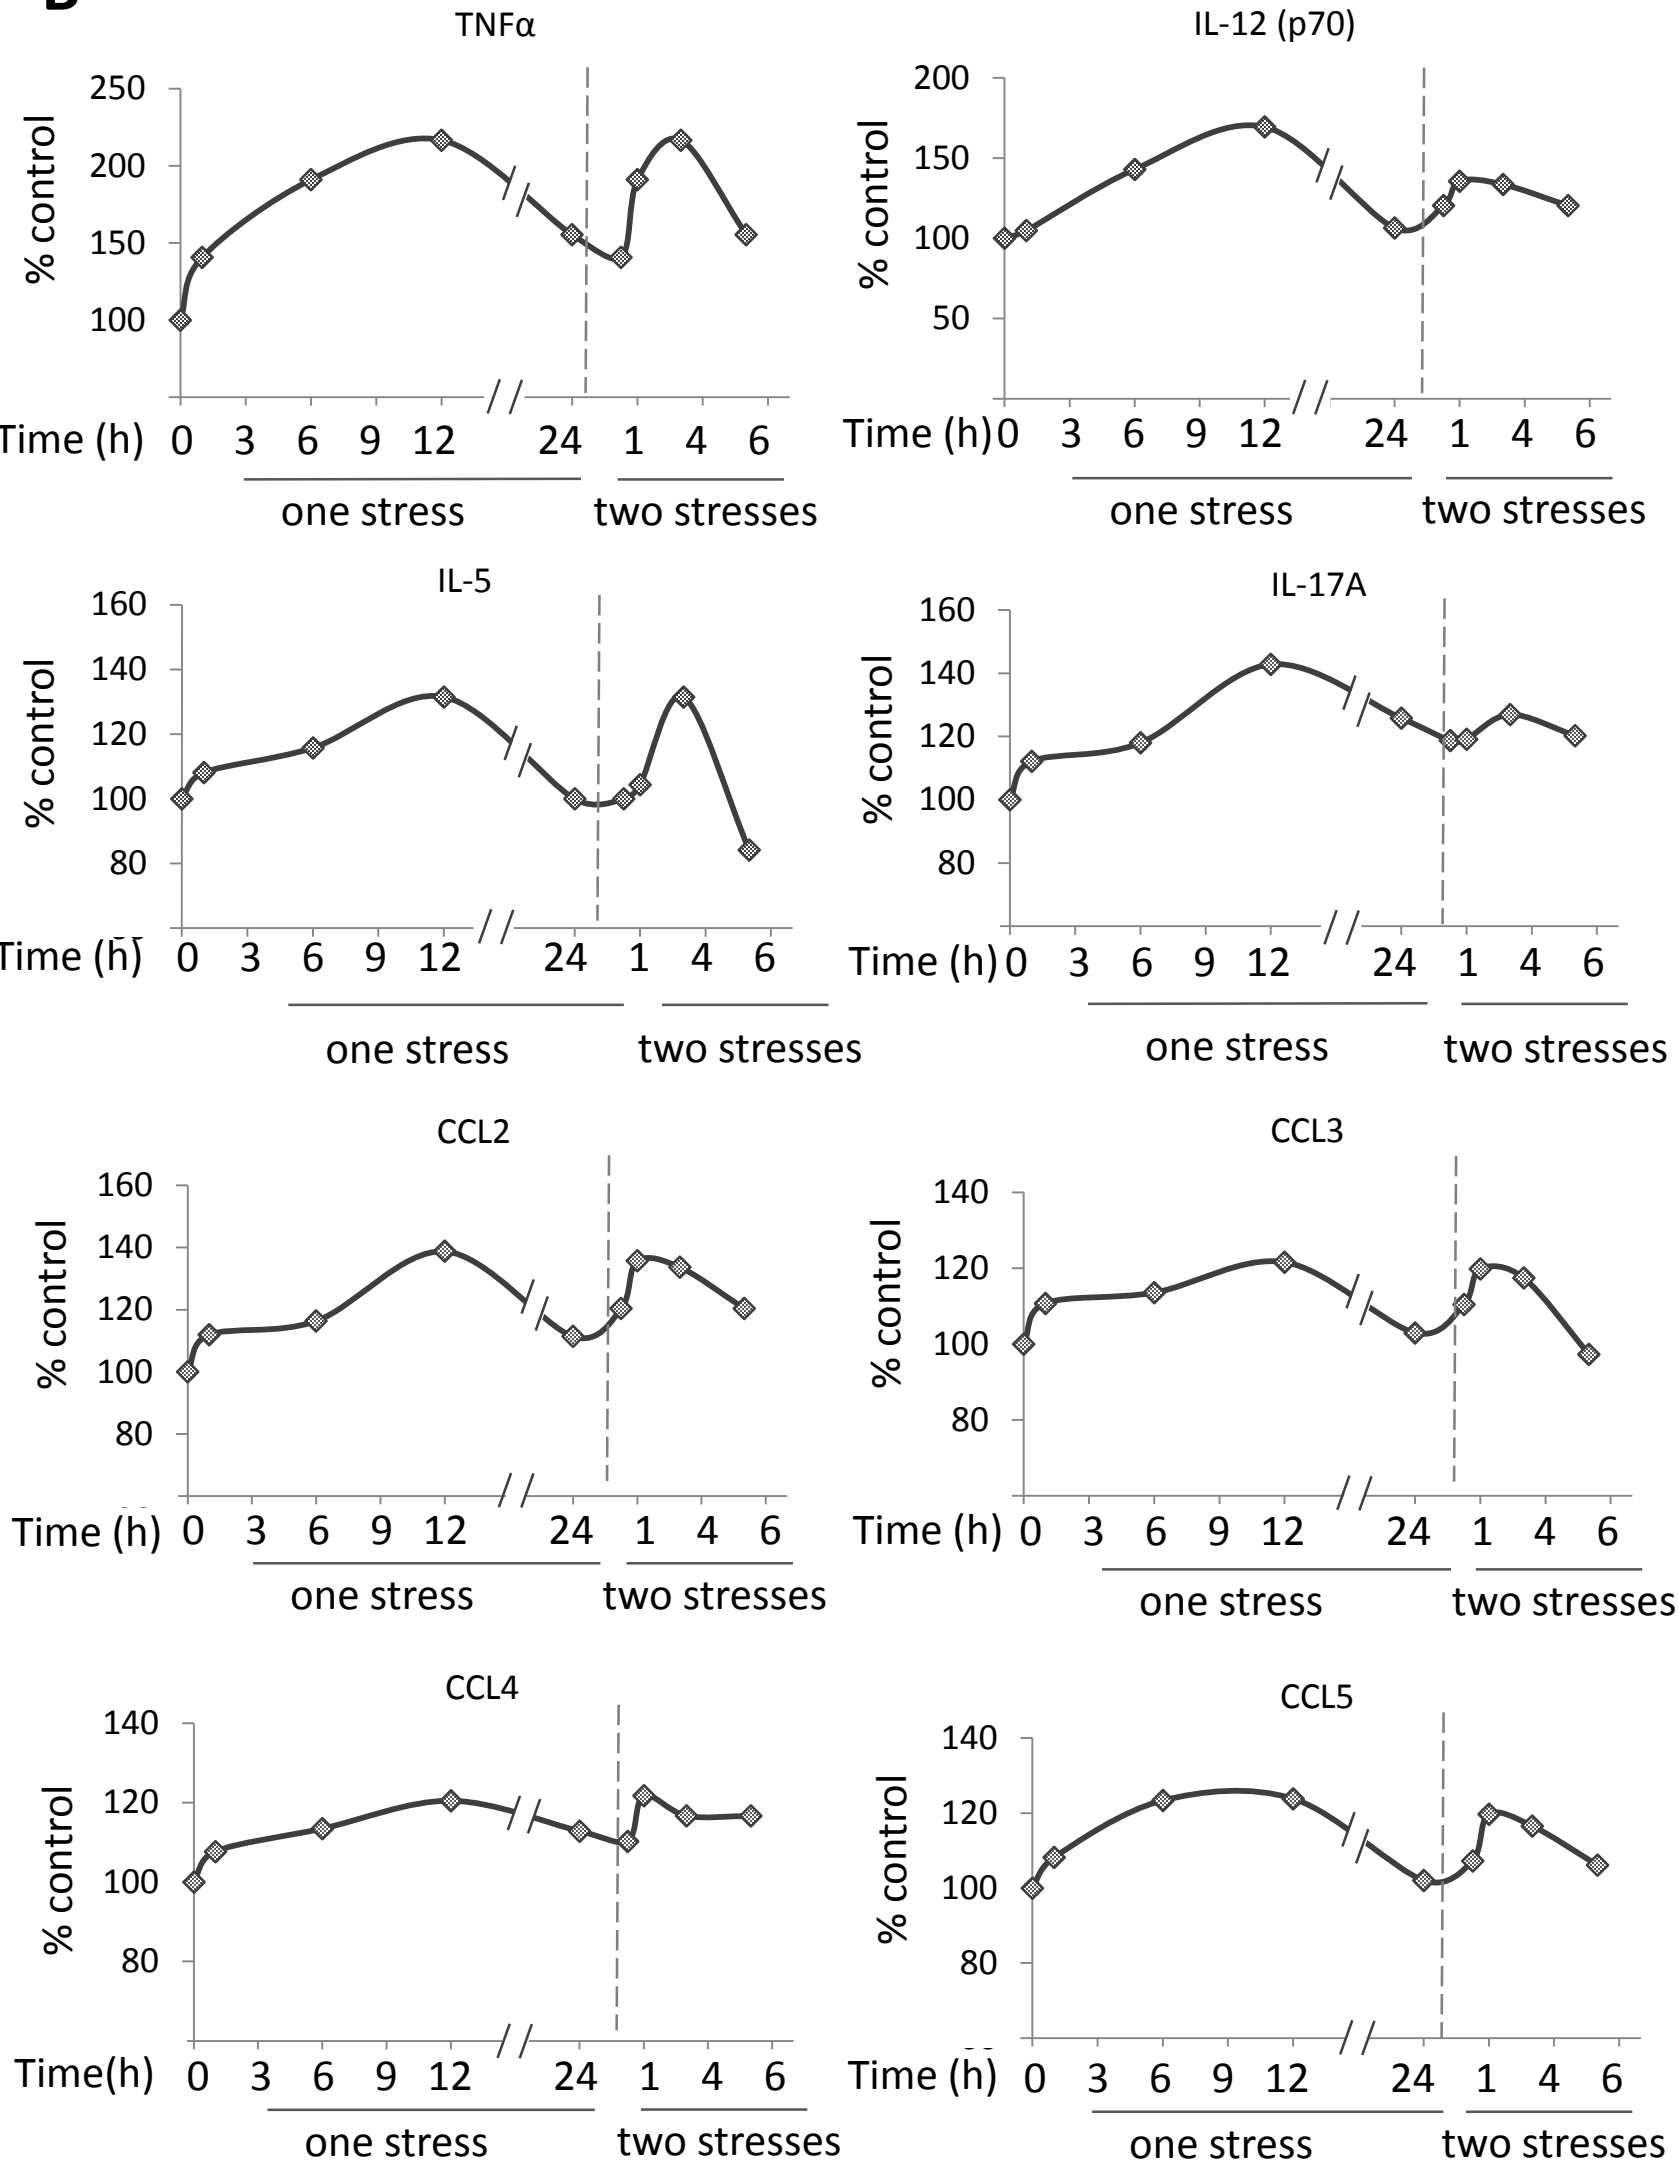

Supplementary Figure 1

**B**

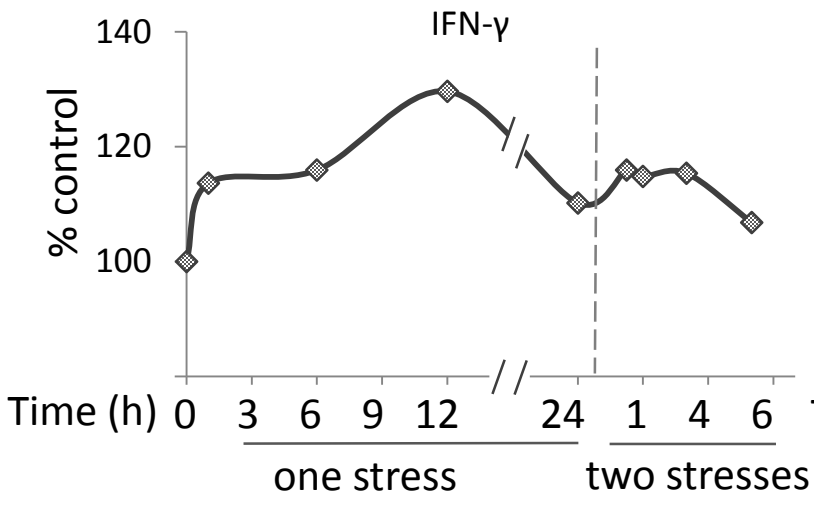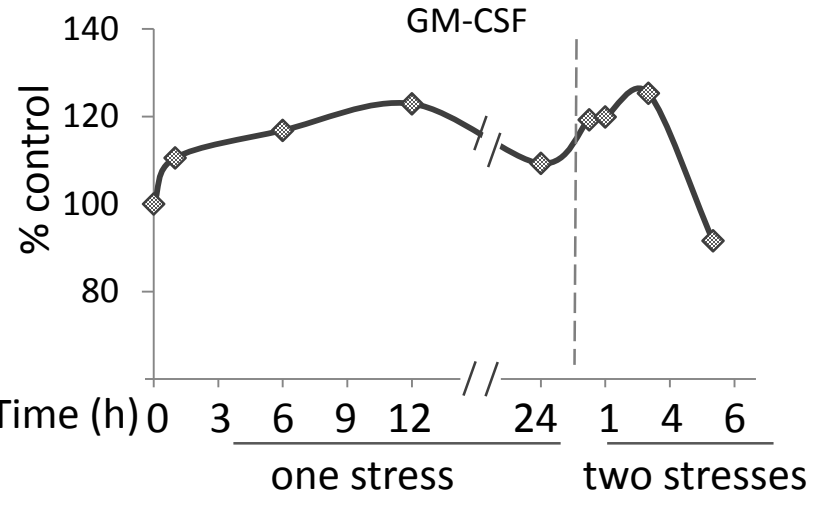

Supplementary Figure 1

**C**

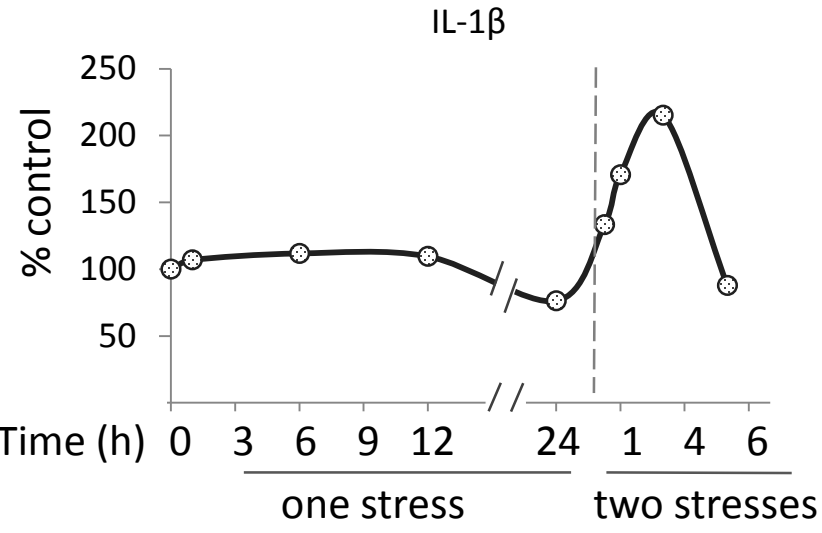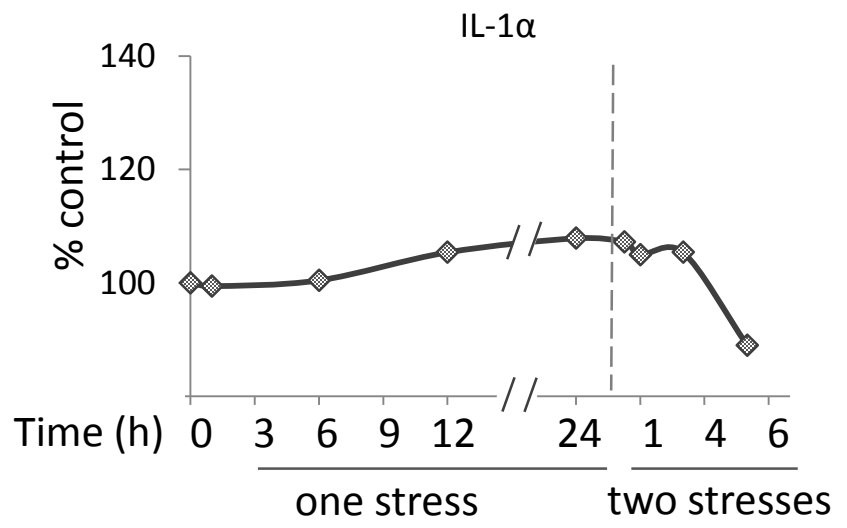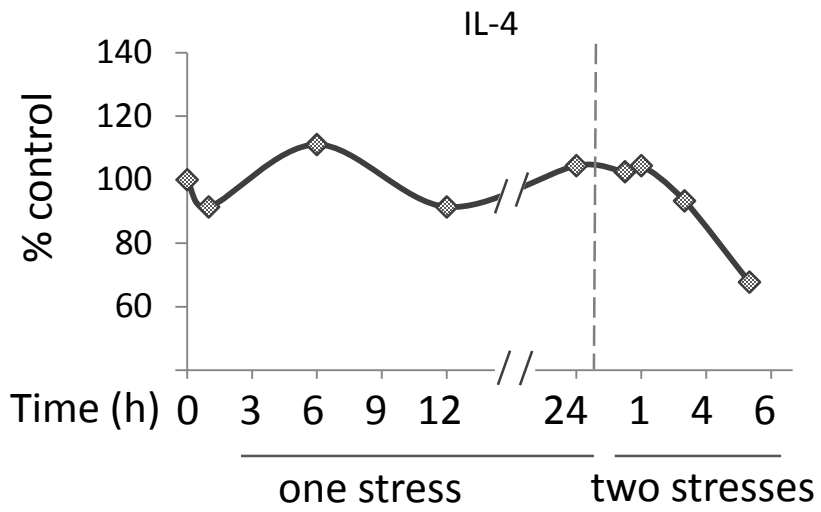



Supplementary Figure 2

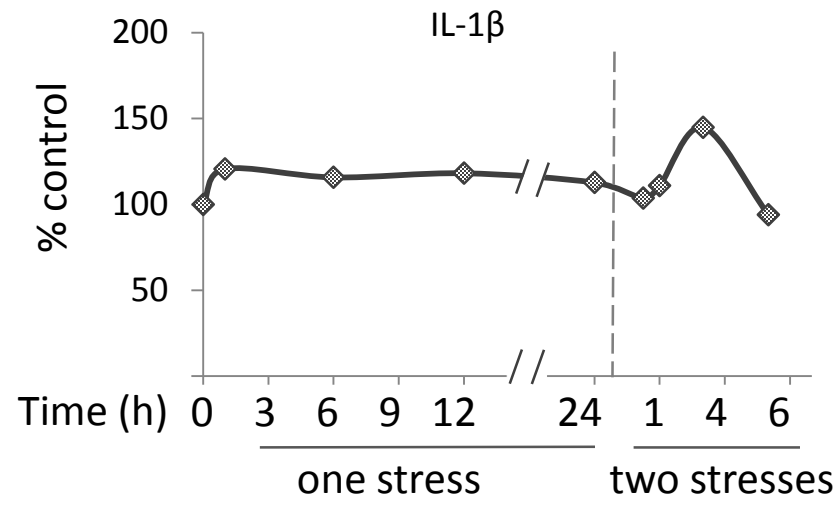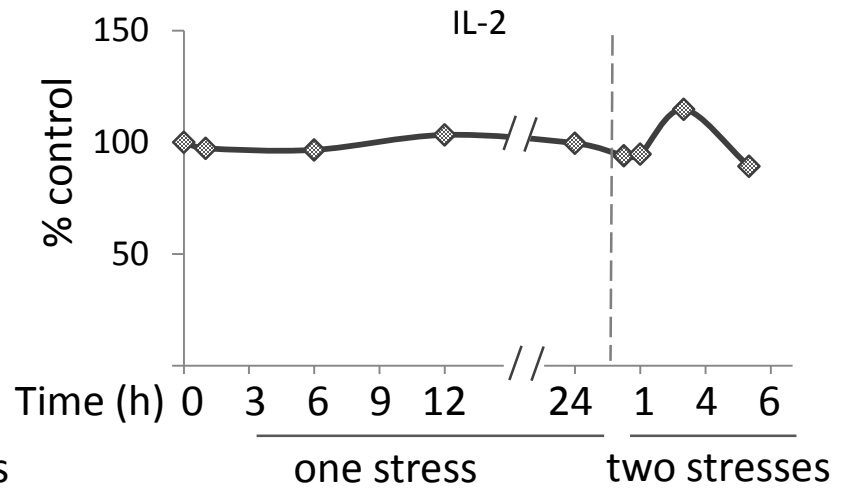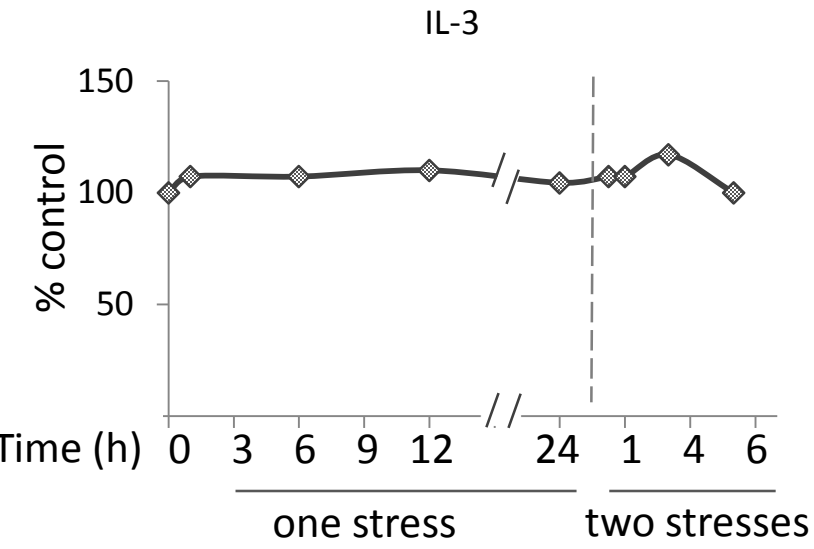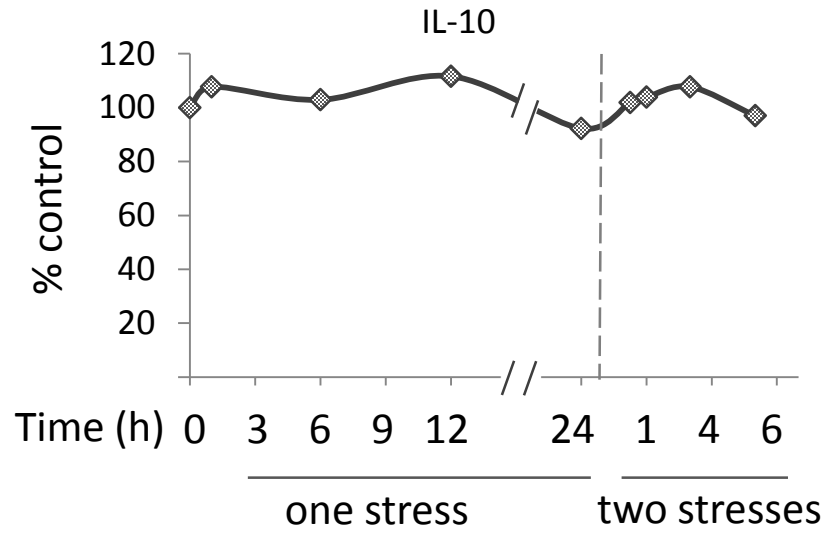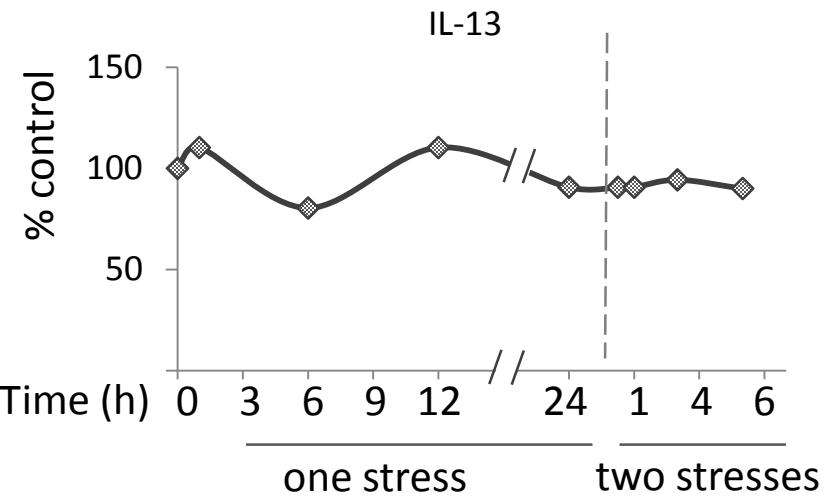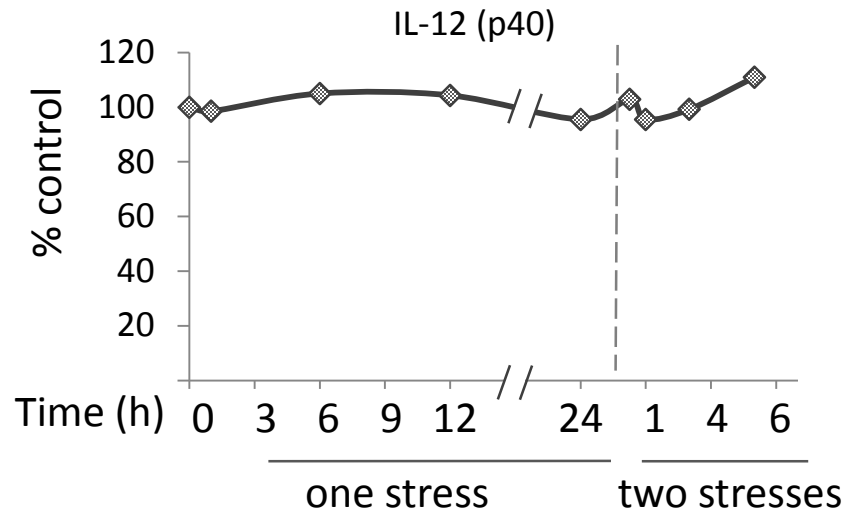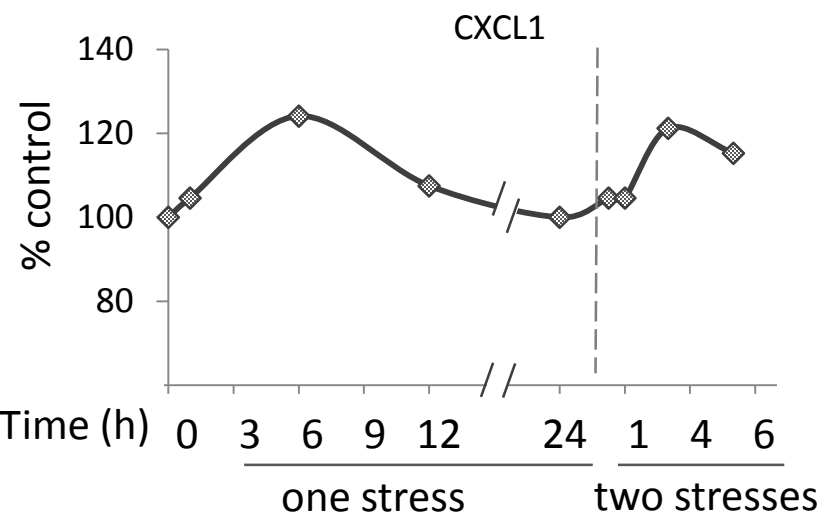

Supplementary Figure 2

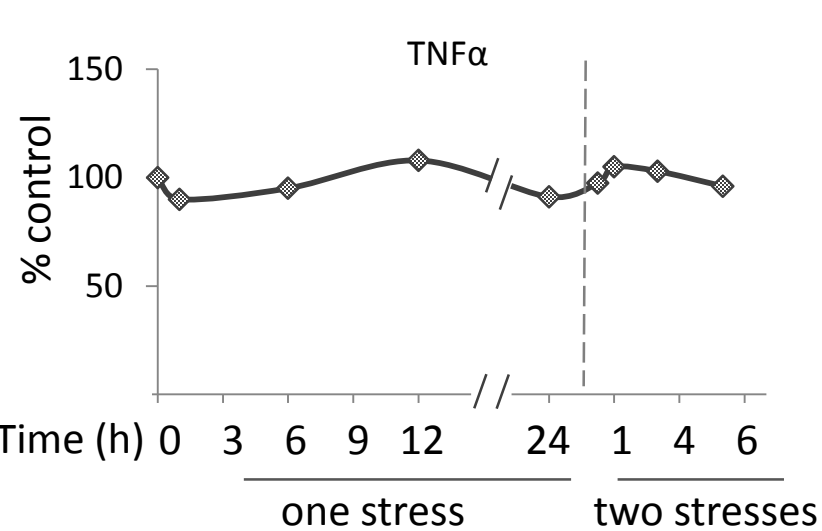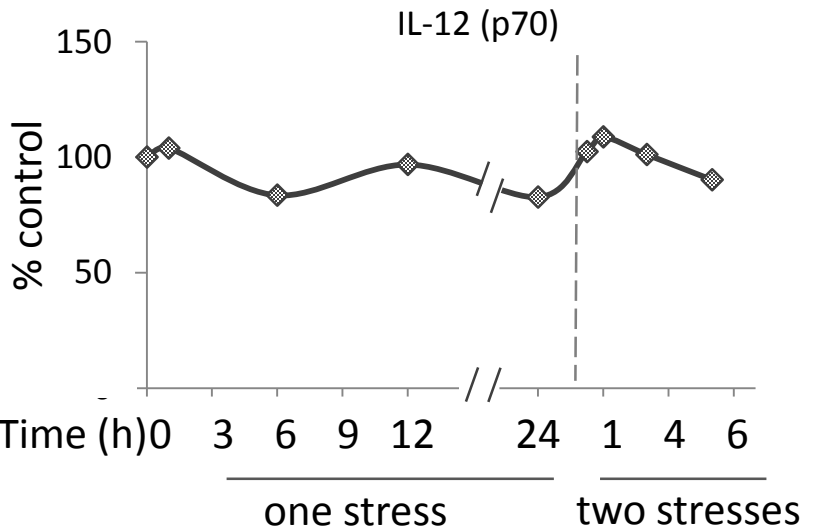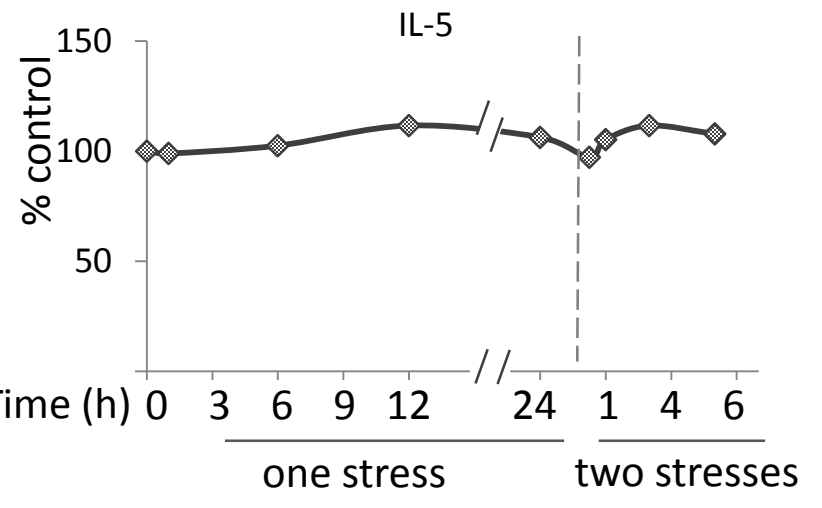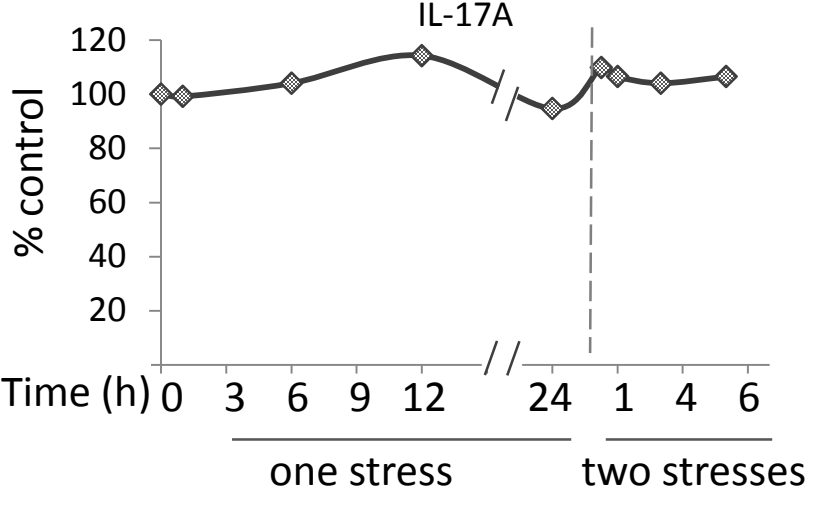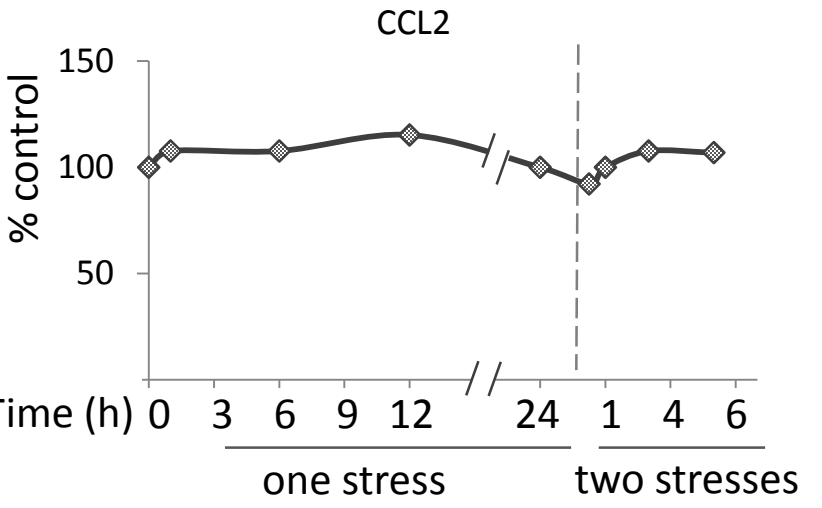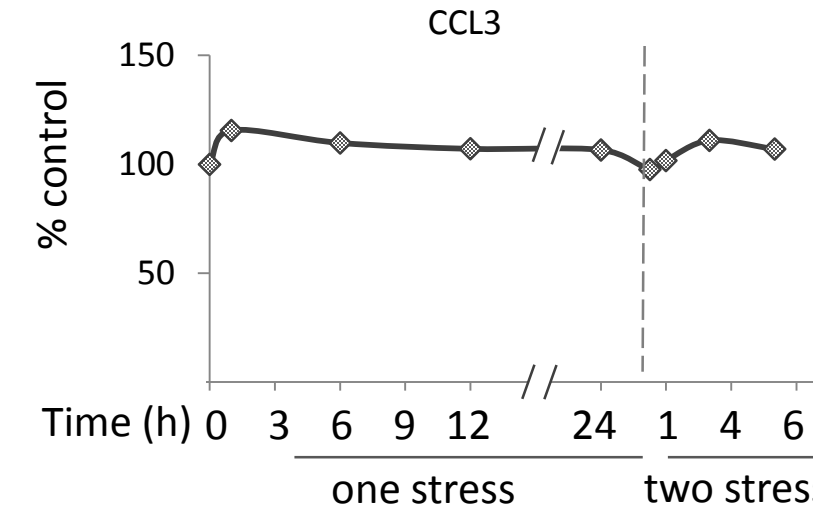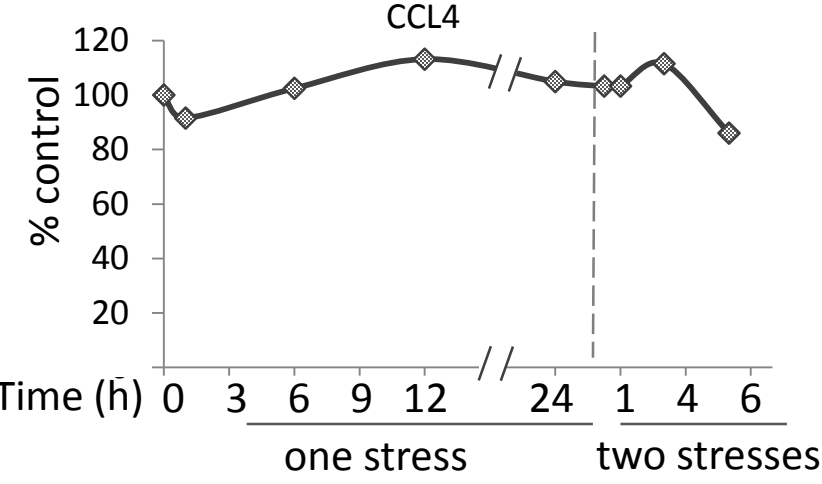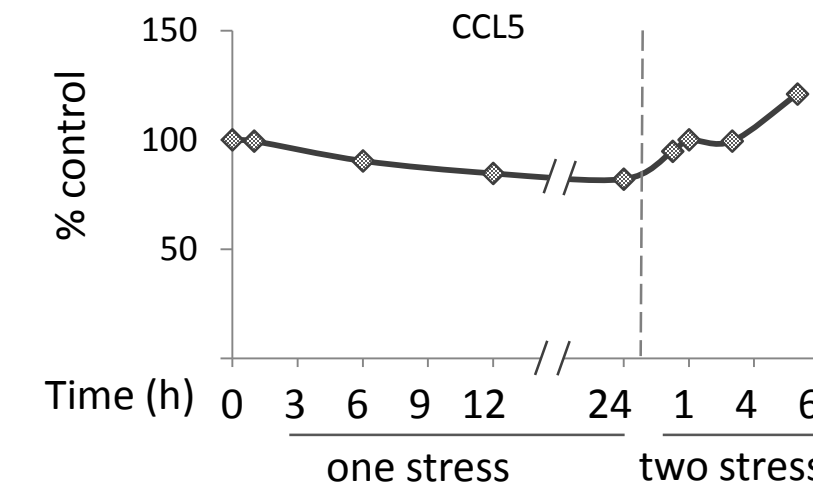

Supplementary Figure 2

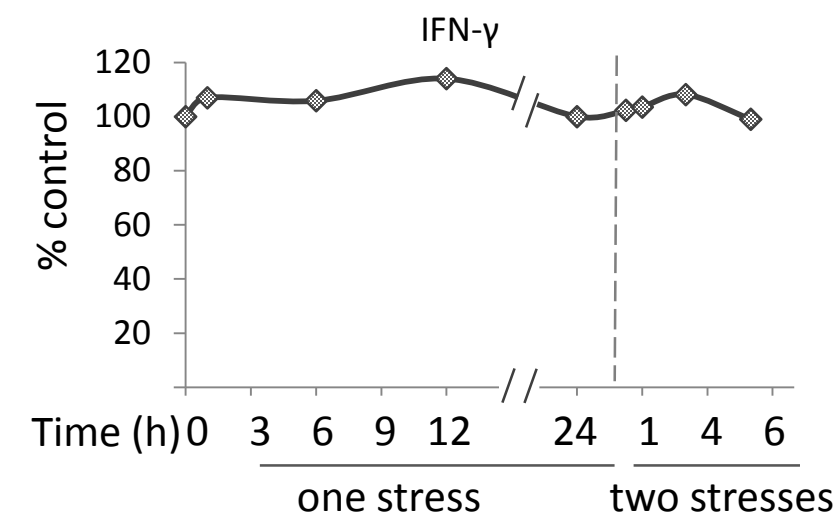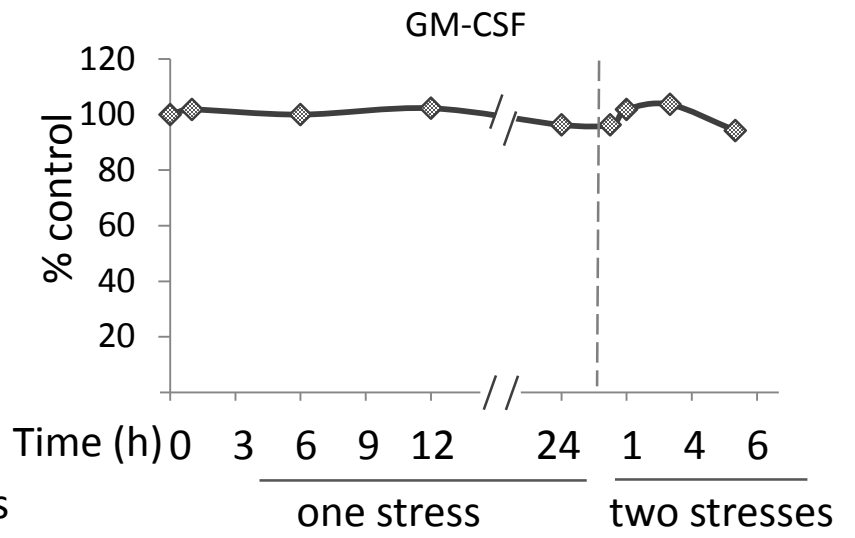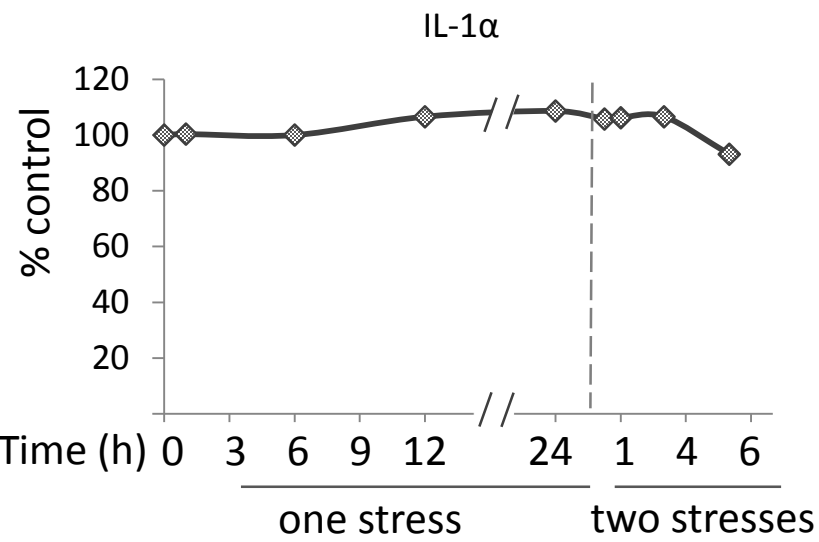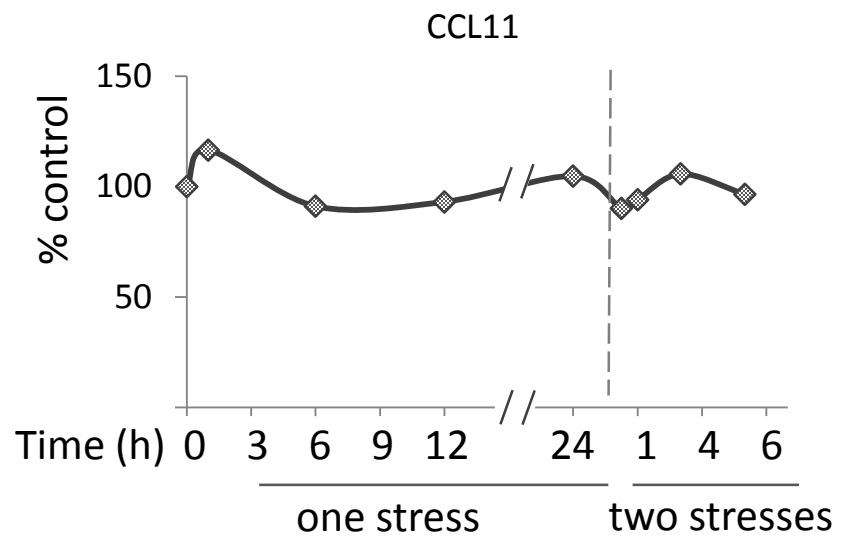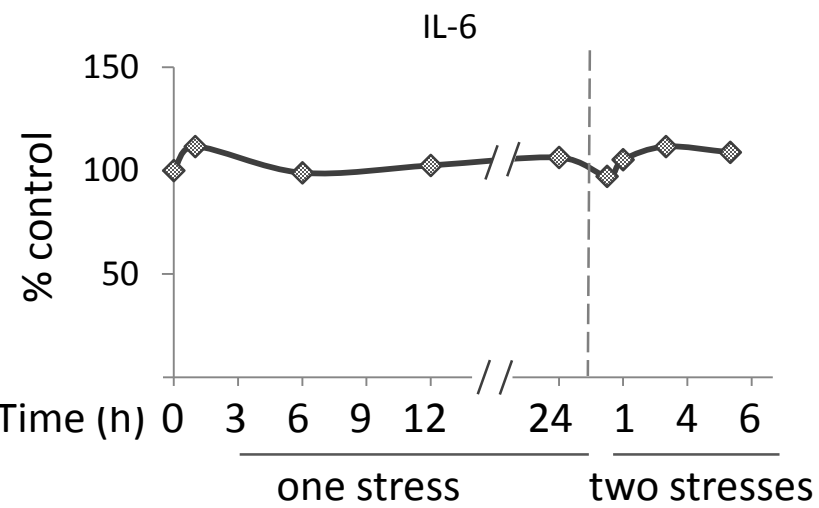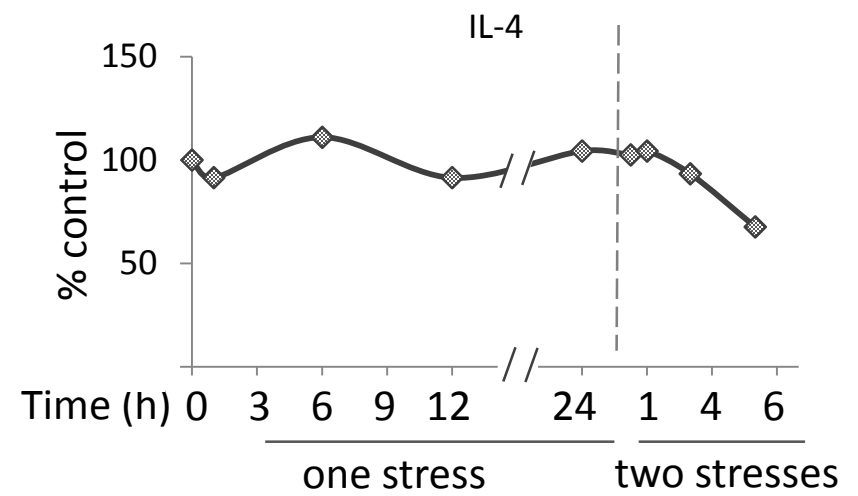

Supplementary Figure 3

Wild-type  
 TLR4<sup>-/-</sup>

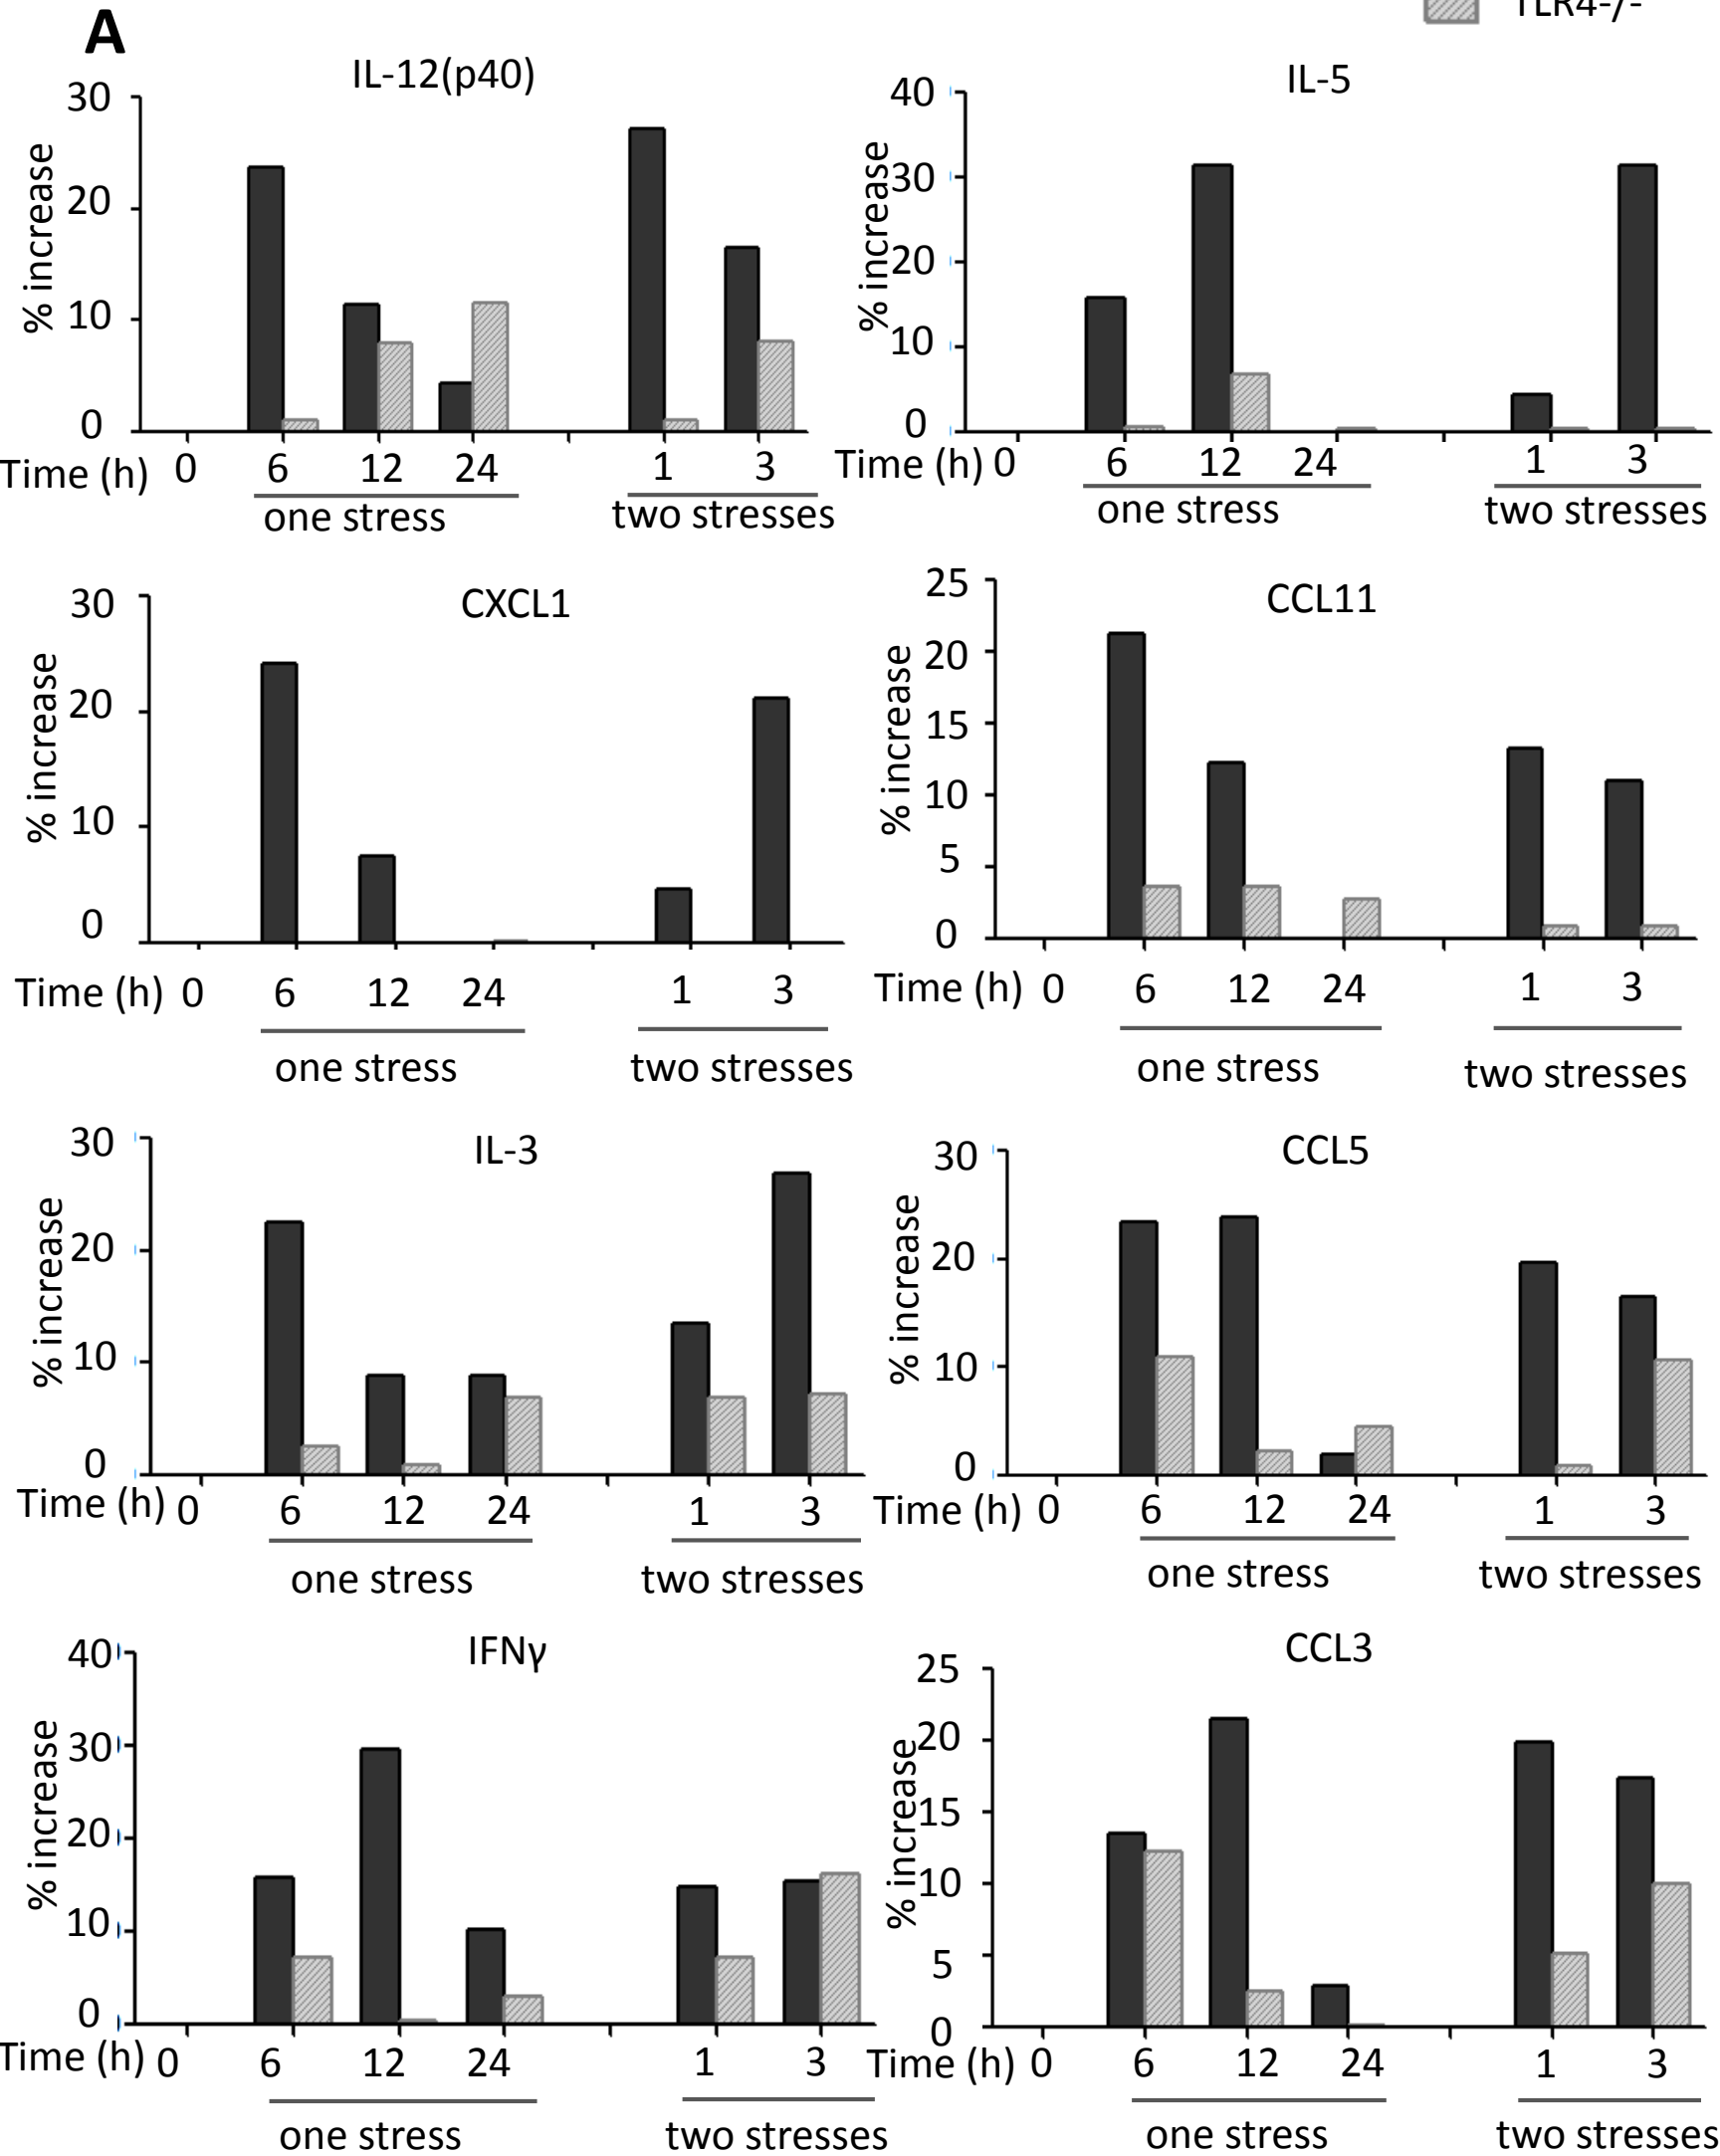

**B**

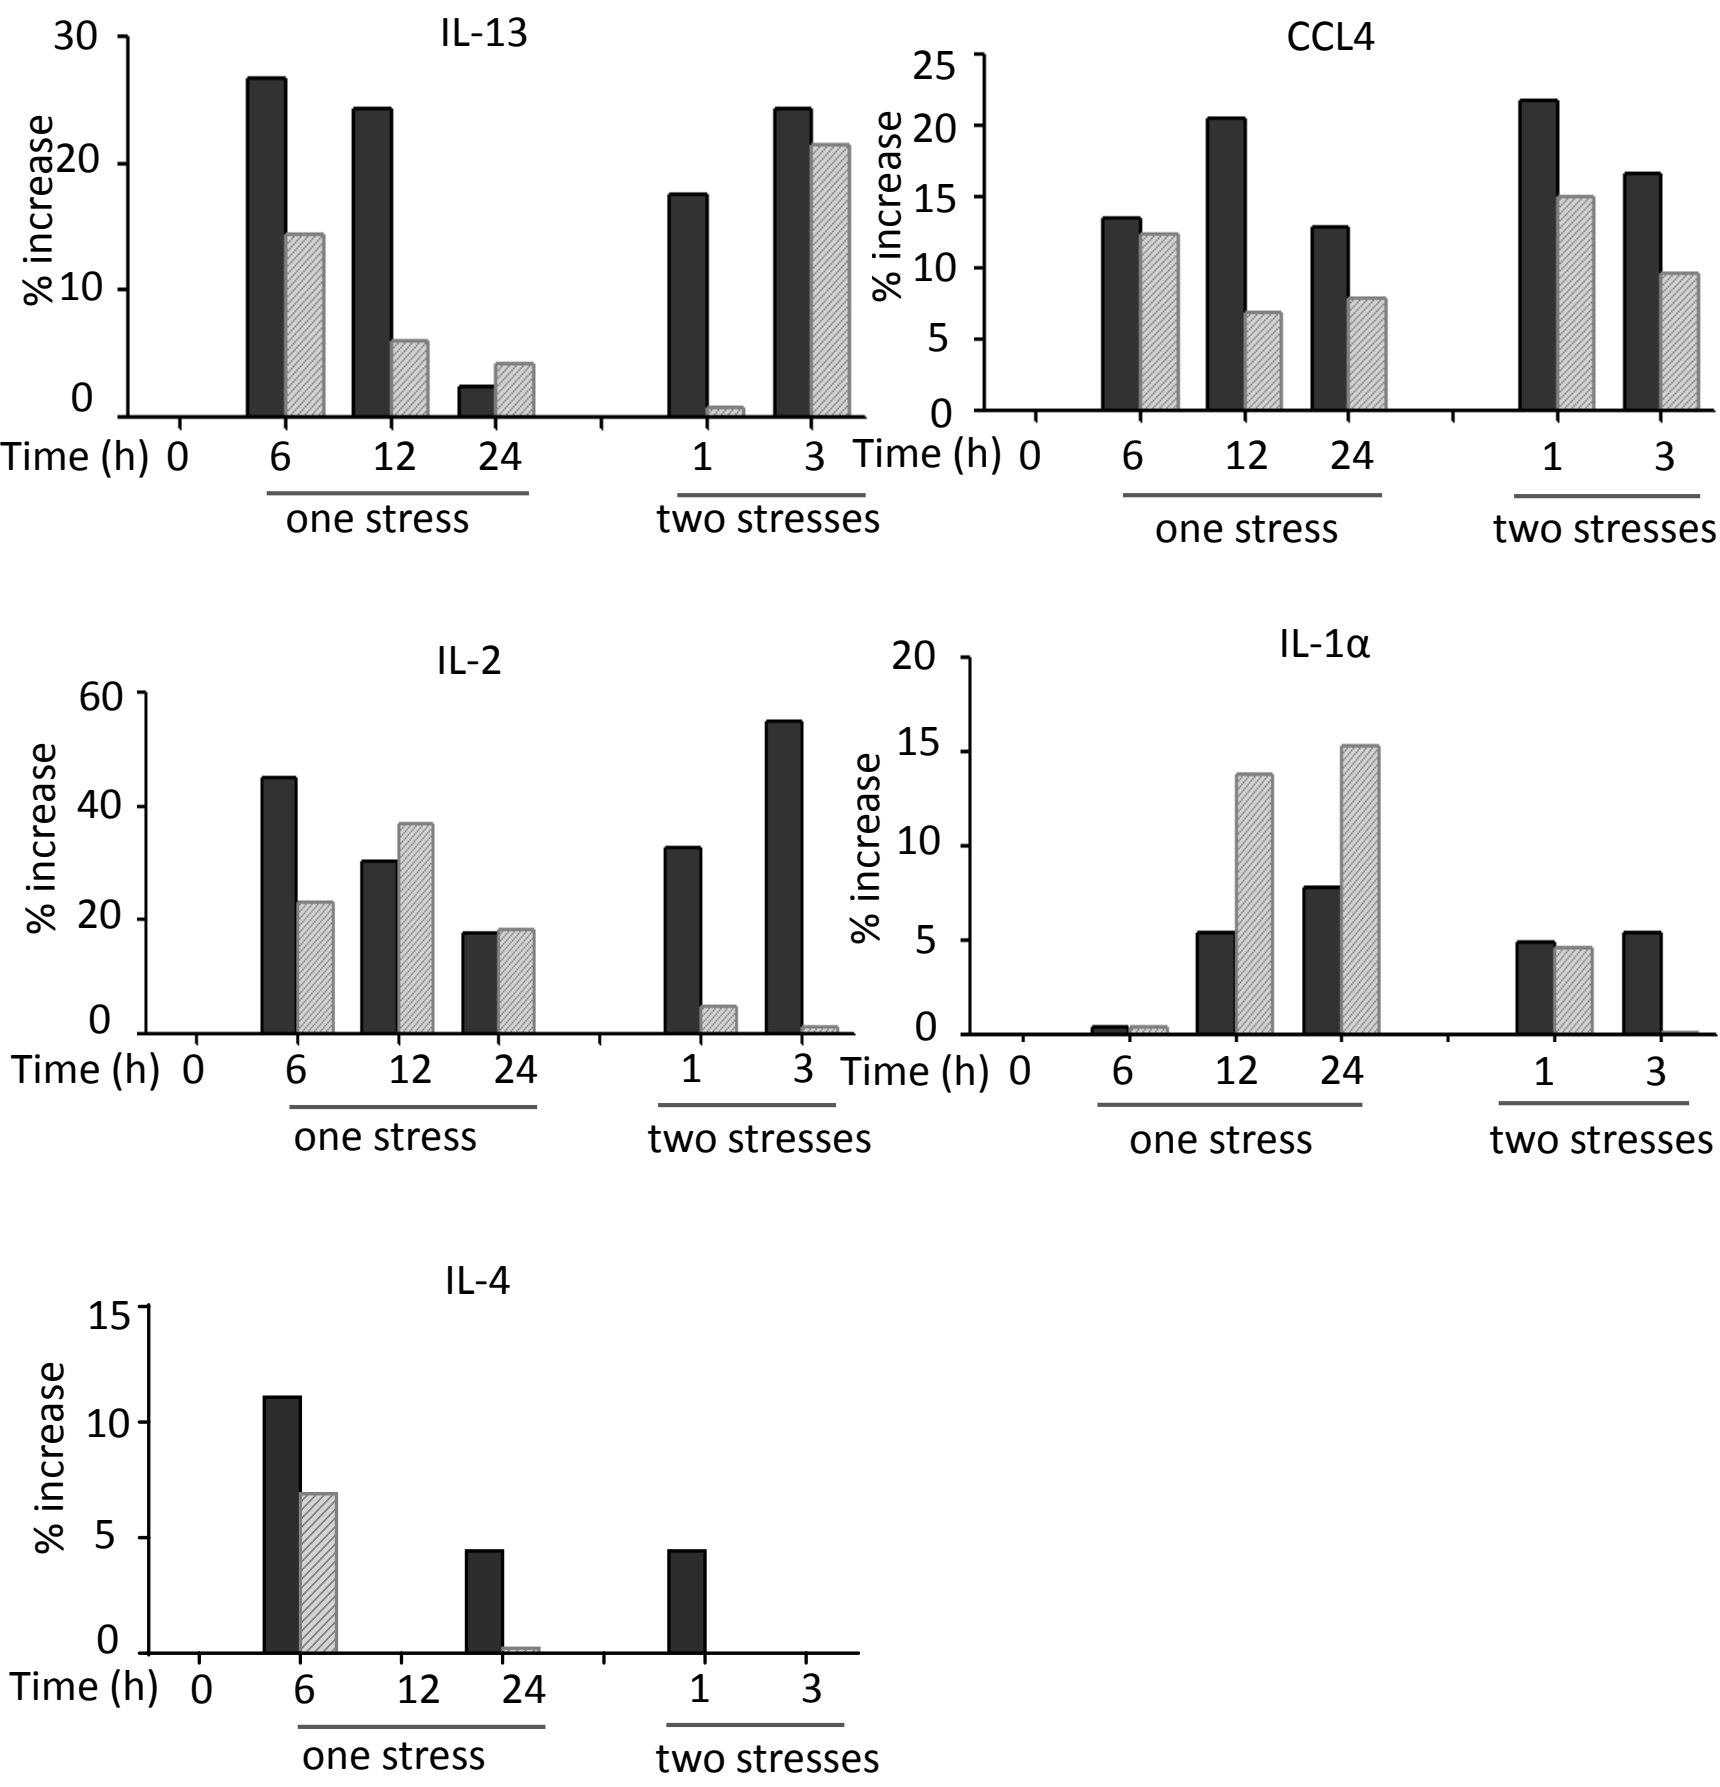

Supplementary Figure 4

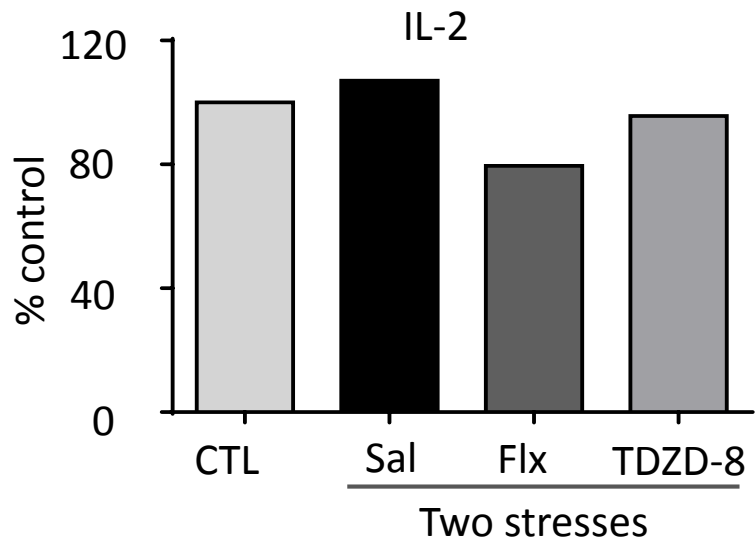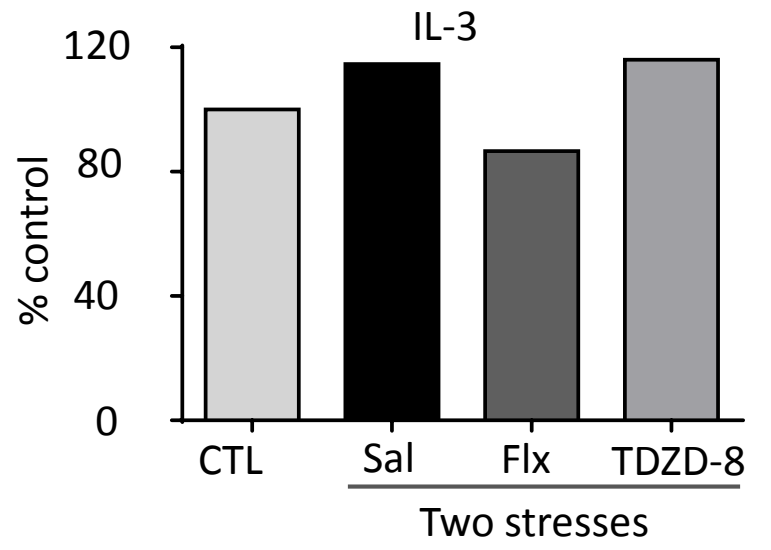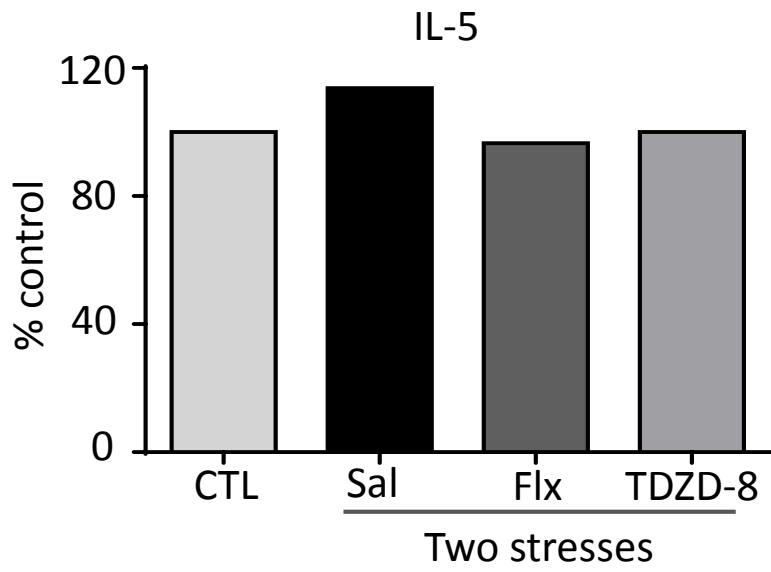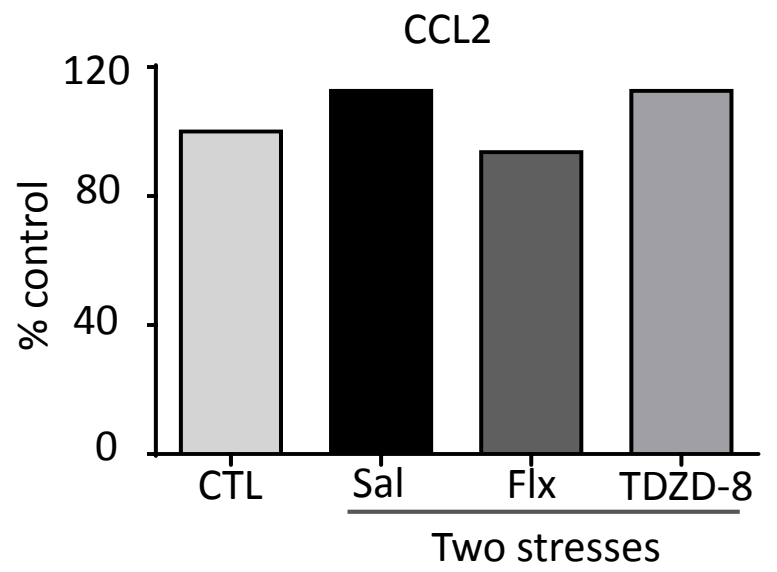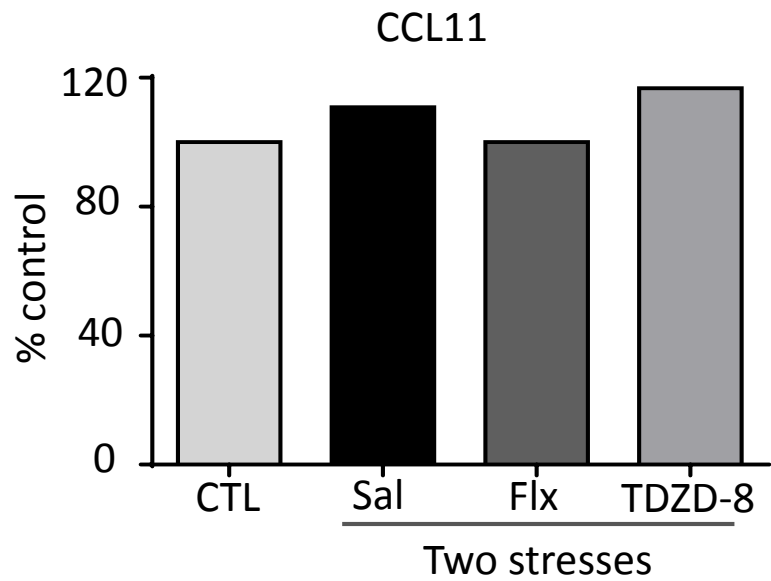

Supplementary Figure 5

CTL  
 3 hr after two stresses  
 12 hr after two stresses

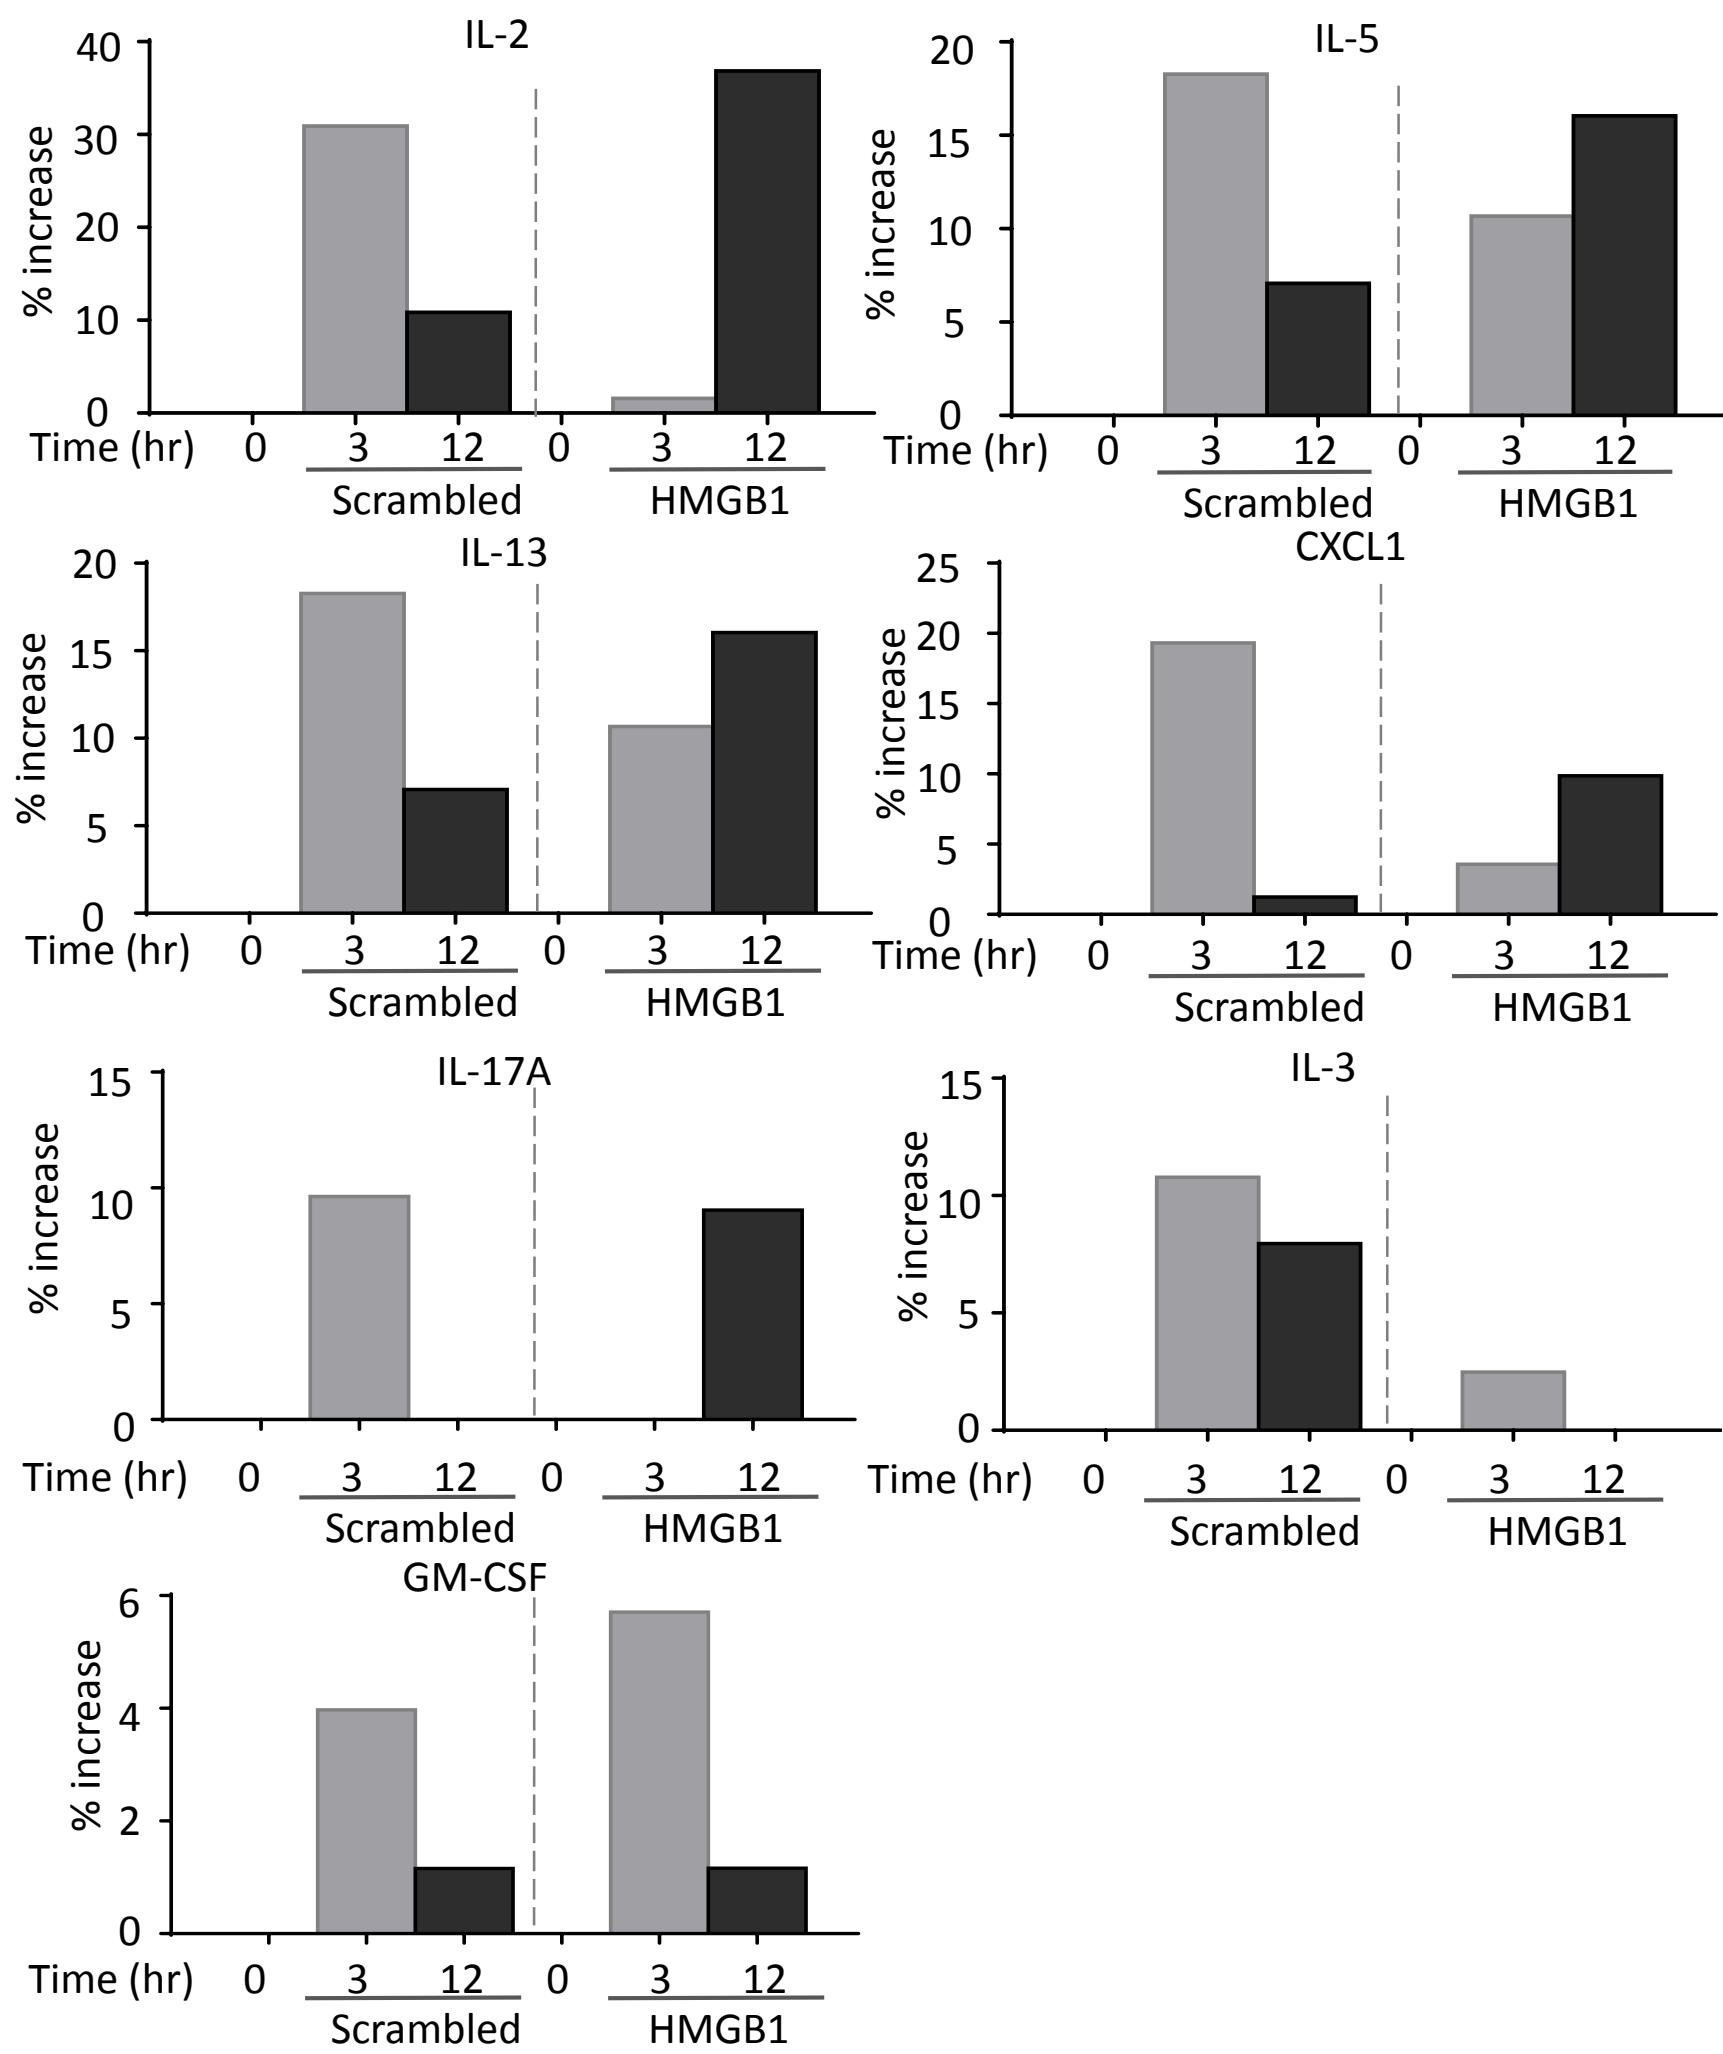

**A**

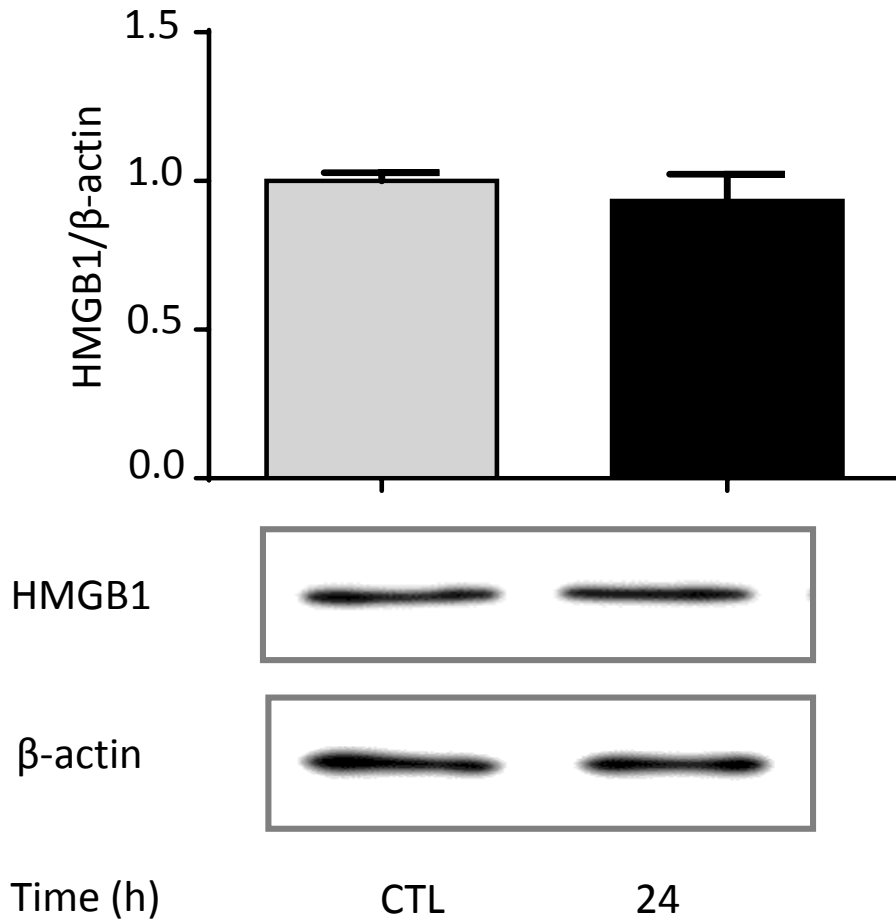

**B**

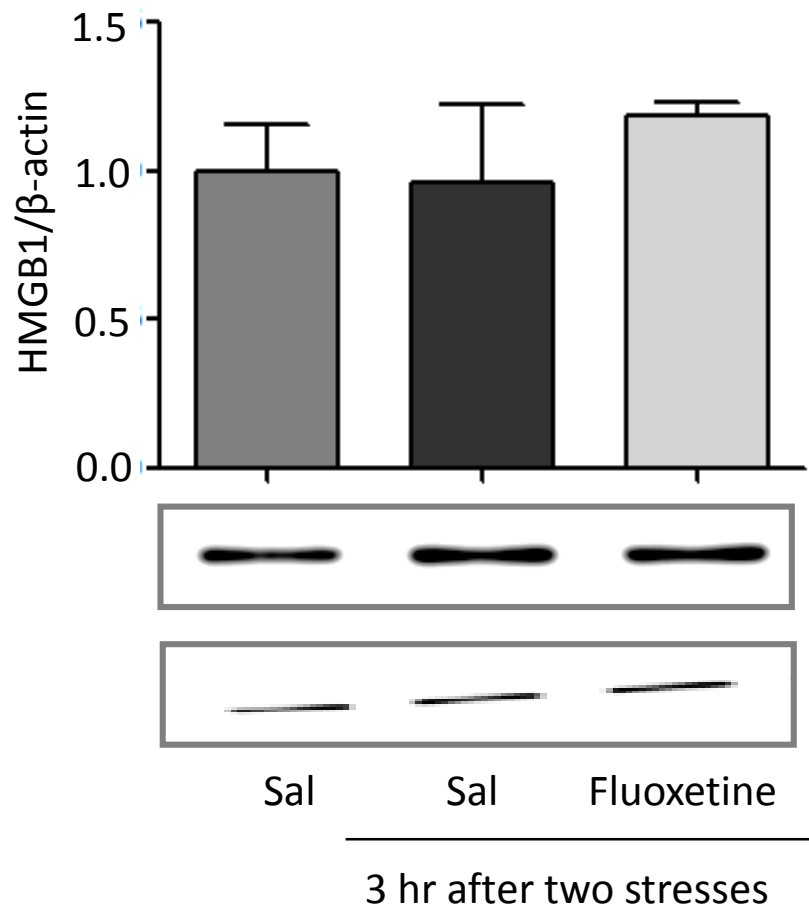

**C**

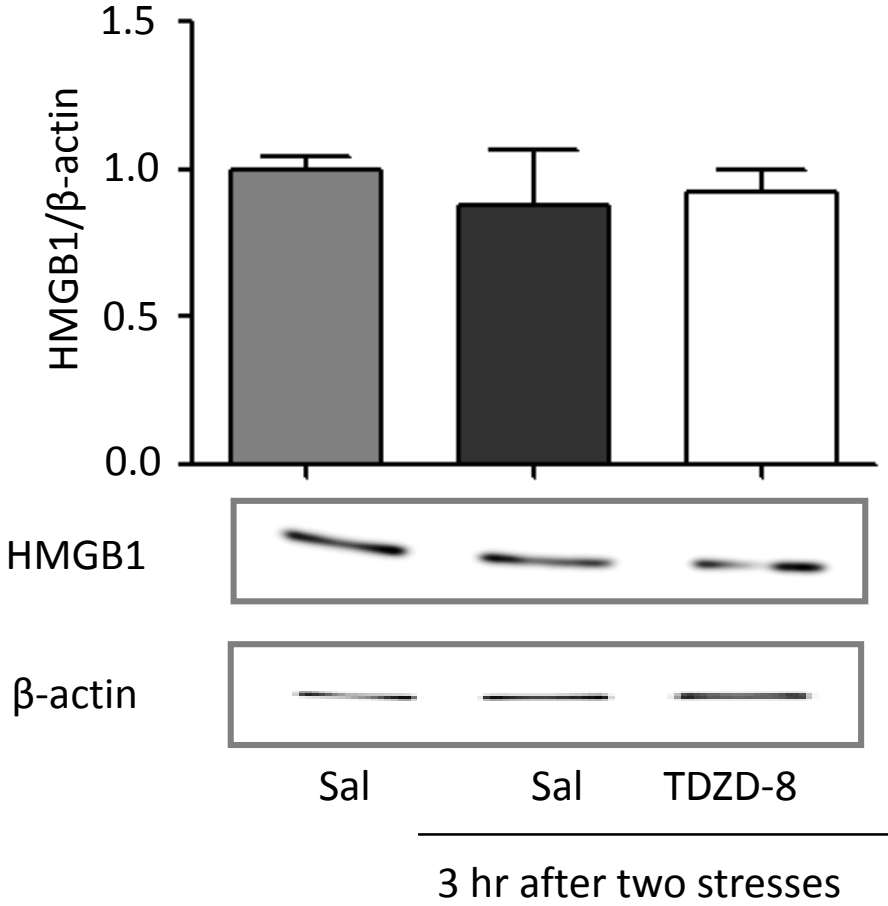



**A**

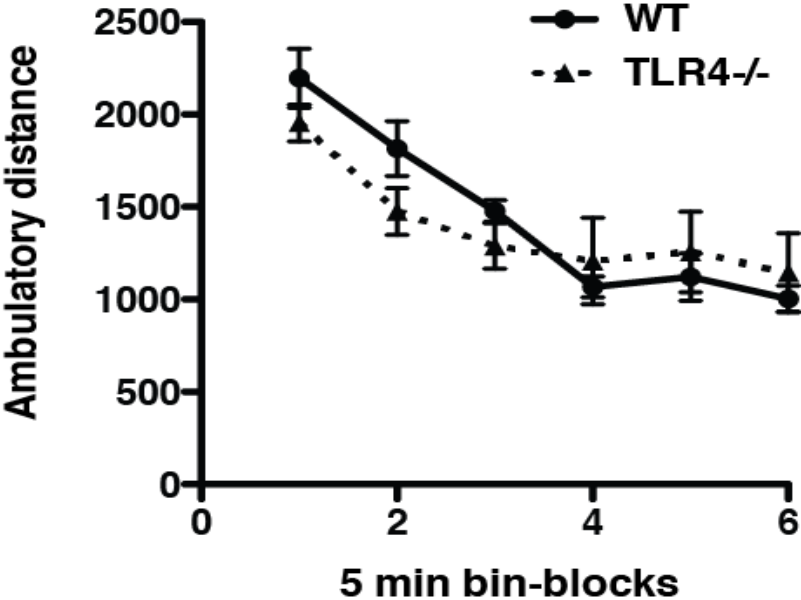

**B**

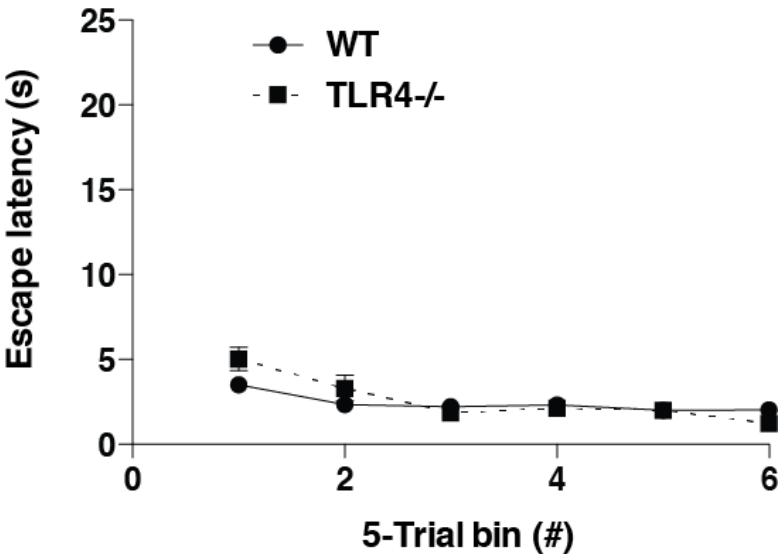

Supplementary Table 1: Times of peak levels after one or two stresses for hippocampal cytokines.

| Time of peak levels |      | One stress               |                                                  |
|---------------------|------|--------------------------|--------------------------------------------------|
|                     |      | 6 hr                     | 12 hr                                            |
| Two stresses        | 1 hr | IL-10, IL-12(p40), CCL11 | IL-12(p70), CCL2, CCL3, CCL4, CCL5, IFN $\gamma$ |
|                     | 3 hr | IL-2, IL-3, IL-13, CXCL1 | TNF $\alpha$ , IL-6, IL-5, IL-17A, GM-CSF        |

Supplementary Table 2: Reported effects of stress on rodent brain cytokine levels

| Stress                                                             | Cytokines                        | Region                                       | Stress effects | Time points after stress | Reference                                                                                                   |
|--------------------------------------------------------------------|----------------------------------|----------------------------------------------|----------------|--------------------------|-------------------------------------------------------------------------------------------------------------|
| Immobilization stress                                              | TNF $\alpha$                     | Cortex                                       | Increase       | Immediately              | Madrigal et al., 2002                                                                                       |
| Acute social defeat stress;                                        | IL-6                             | Prefrontal cortex                            | Increase       | 1.25 hr                  | Audet et al., 2011                                                                                          |
| Inescapable foot shocks; inescapable tail shocks                   | IL-1 $\beta$ , IL-10             | Hypothalamus                                 | Increase       | Various times            | Nguyen et al., 2000; O'Connor et al., 2003; Deak et al., 2005; Blandino et al., 2006; Blandino et al., 2009 |
| Chronic restraint stress                                           | IL-1 $\beta$ , IL-6              | Prefrontal cortex                            | Increase       | Immediately              | Gárate et al., 2013                                                                                         |
| Repeated social defeat stress                                      | IL-1 $\beta$                     | Brain microglia                              | Increase       | 14 hr                    | Wohleb et al., 2011                                                                                         |
| Chronic mild stress                                                | TNF $\alpha$ , IL-18, IL-4, IL-6 | Hippocampus, prefrontal cortex, hypothalamus | Increase       | Immediately              | Gárate et al., 2011; You et al., 2011                                                                       |
|                                                                    | IL-10, TGF- $\beta$              | Hippocampus, cortex                          | Decrease       |                          |                                                                                                             |
| Inescapable foot shocks; inescapable tail shocks; forced swim test | IL-1 $\beta$                     | Hippocampus, cortex                          | No effect      | Various times            | Nguyen et al., 2000; Deak et al., 2003;                                                                     |
| Inescapable foot shocks;                                           | IL-6, IL-10                      | Hippocampus, cortex                          | No effect      | Immediately              | Blandino et al., 2009                                                                                       |

Supplementary Table 3: Reported effects of stress on cytokine increases induced by LPS

| Stress                            | Cytokines                   | Region                           | Stress effects on LPS response | Time points after LPS | Reference                                                        |
|-----------------------------------|-----------------------------|----------------------------------|--------------------------------|-----------------------|------------------------------------------------------------------|
| Repeated social defeat stress     | TNF $\alpha$ , IL-1 $\beta$ | Brain                            | Increase                       | 3 hr                  | Quan et al., 2001                                                |
| Inescapable tail shocks           | IL-1 $\beta$                | Hippocampus, hypothalamus cortex | Increase                       | 1, 2hr                | Johnson et al., 2002; Johnson et al., 2003; Johnson et al., 2004 |
| Chronic unpredictable mild stress | TNF $\alpha$ , IL-1 $\beta$ | Prefrontal cortex                | Increase                       | 2 hr                  | Munhoz et al., 2006; De Pablos et al., 2006                      |
| Inescapable tail shocks           | IL-1 $\beta$                | Hippocampal microglia            | Increase                       | 4 hr                  | Frank et al., 2007                                               |
| Chronic unpredictable mild stress | TNF $\alpha$ , IL-1 $\beta$ | Hippocampus                      | Increase                       | 6 hr                  | Espinosa-Oliva et al., 2011                                      |
| Repeated social defeat stress     | TNF $\alpha$ , IL-1 $\beta$ | Brain macrophages                | Increase                       | 4, 24 hr              | Wohleb et al., 2012                                              |
